# Supplementary material for: Long-term repeatability and interlaboratory reproducibility of high-precision ID-TIMS U–Pb geochronology
Source: Royal Society of Chemistry journal article supplement (doi:10.1039/d1ja00116g), 2021-01-01
Supplement: d1ja00116g1.pdf [file d1ja00116g1.pdf]

## Supplementary material for

### Long-term repeatability and interlaboratory reproducibility of high-precision ID-TIMS U-Pb geochronology

Urs Schaltegger, Maria Ovtcharova, Sean P. Gaynor, Blair Schoene, Jörn-Frederik Wotzlaw, Joshua F.H.L. Davies, Federico Farina, Nicolas Greber, Dawid Szymanowski, Cyril Chelle-Michou



Fig. S1 Compilation of error contributions from 112 U-Pb age determinations of natural zircon in the UNIGE lab. Data are compiled in Table S3.



Fig. S2 Concordia diagrams of the three measurement blocks of GJ-1 at University of Geneva, data are in Table S6

Table S1: Compilation of single grain U-Pb analyses measured at University of Geneva with error sources

| Fraction        | Composition |        |        |       | Dates (Ma) |       |        |       |        |      |         |     |       | Isotopic Ratios |         |           |        |         |       |          | Error contributions (%) |          |       |          |       |       |
|-----------------|-------------|--------|--------|-------|------------|-------|--------|-------|--------|------|---------|-----|-------|-----------------|---------|-----------|--------|---------|-------|----------|-------------------------|----------|-------|----------|-------|-------|
|                 | Th/         | Pb*    | Pbc    | Pb*/  | 206Pb/     | ±2σ   | 206Pb/ | ±2σ   | 207Pb/ | ±2σ  | 207Pb/  | ±2σ | Corr. | % disc g        | 206Pb/  | 206Pb/    | 207Pb/ | 207Pb/  | ±2σ % | ±2σ %    | Alpha Pb                | Blank    | Pb    | U        | U     |       |
|                 | U a         | (pg) b | (pg) c | Pbc d | 238U e     | abs   | <Th> f | abs   | 235U e | abs  | 206Pb e | abs | coef. |                 | 204Pb h | 238U i    | ±2σ %  | 235U i  | ±2σ % | 206Pb i  | ±2σ %                   | measured |       | measured | Total |       |
| Alpha tests     |             |        |        |       |            |       |        |       |        |      |         |     |       |                 |         |           |        |         |       |          |                         |          |       |          |       |       |
| AN731_b1        | 0.07        | 1.77   | 0.23   | 8     | 201.95     | 0.34  | 202.05 | 0.34  | 201.3  | 2.2  | 194     | 25  | 0.705 | -4.32           | 518     | 0.031823  | 0.17   | 0.2193  | 1.2   | 0.04999  | 1.1                     | 38.1     | 34.2  | 27.4     |       | 99.7  |
| AN731_b2        | 0.02        | 4.38   | 0.23   | 19    | 200.19     | 0.25  | 200.3  | 0.25  | 199.6  | 1.2  | 192     | 14  | 0.472 | -4.05           | 1255    | 0.031542  | 0.13   | 0.2172  | 0.66  | 0.04997  | 0.61                    | 56.4     | 8.8   | 33.2     | 3.3   | 101.7 |
| AN731_b3        | 0.05        | 1.83   | 0.32   | 6     | 202.2      | 0.54  | 202.3  | 0.54  | 201.7  | 2.7  | 196     | 31  | 0.598 | -3              | 388     | 0.031863  | 0.27   | 0.2198  | 1.5   | 0.05005  | 1.3                     | 28.2     | 44.5  | 25.6     | 1.4   | 99.7  |
| AN731_b4        | 0.02        | 1.58   | 0.37   | 4     | 202.22     | 0.66  | 202.32 | 0.66  | 191.5  | 3.4  | 61      | 42  | 0.563 | -230            | 297     | 0.03187   | 0.33   | 0.2075  | 1.9   | 0.04726  | 1.8                     | 22.9     | 59.6  | 17.4     |       | 99.9  |
| AN731_z1        | 2.95        | 8.09   | 0.22   | 37    | 201.14     | 0.22  | 201.16 | 0.22  | 199    | 1.1  | 174     | 12  | 0.775 | -15.69          | 1318    | 0.031694  | 0.11   | 0.2165  | 0.6   | 0.04957  | 0.51                    | 59.8     | 8.7   | 31.3     |       | 99.8  |
| AN731_z2        | 1.73        | 3.79   | 0.24   | 16    | 201.07     | 0.31  | 201.12 | 0.31  | 199.1  | 1.6  | 176     | 19  | 0.645 | -13.98          | 718     | 0.031683  | 0.16   | 0.2167  | 0.9   | 0.04962  | 0.8                     | 49.8     | 23.9  | 26.16    |       | 99.86 |
| AN731_z5        | 0.64        | 0.641  | 0.75   | 1     | 2017       | 24    | 2017   | 24    | 2065   | 35   | 2113    | 56  | 0.689 | 4.53            | 62      | 0.3675    | 1.4    | 6.64    | 4     | 0.1312   | 3.2                     | 2.3      | 92.6  | 5.03     |       | 99.93 |
| AN733_z1        | 0.66        | 13.3   | 0.93   | 14    | 326.41     | 0.7   | 326.49 | 0.7   | 362.3  | 1.8  | 599     | 11  | 0.635 | 45.53           | 798     | 0.05194   | 0.22   | 0.4288  | 0.6   | 0.05991  | 0.49                    | 61.9     | 24.4  | 13.5     |       | 99.8  |
| AN733_z2        | 0.85        | 4.95   | 1.03   | 5     | 543        | 1.1   | 543.1  | 1.1   | 574.4  | 6.7  | 701     | 29  | 0.735 | 22.48           | 270     | 0.06789   | 0.21   | 0.761   | 1.5   | 0.0628   | 1.4                     | 21.5     | 68    | 10.3     |       | 99.8  |
| AN733_z3        | 0.79        | 14.2   | 0.42   | 34    | 611.93     | 0.88  | 612.01 | 0.88  | 618.6  | 1.5  | 643.2   | 5   | 0.789 | 4.86            | 1813    | 0.09958   | 0.15   | 0.8391  | 0.33  | 0.06114  | 0.23                    | 80.44    | 6.3   | 13.13    |       | 99.87 |
| AN733_z4        | 0.61        | 24.4   | 0.34   | 72    | 884.2      | 1.8   | 884.3  | 1.8   | 920.4  | 2.1  | 1008.3  | 4.1 | 0.842 | 12.31           | 3998    | 0.14702   | 0.22   | 1.4756  | 0.35  | 0.07283  | 0.2                     | 66.5     | 1.08  | 28.77    |       | 99.95 |
| AN733_z5        | 0.59        | 5.27   | 0.22   | 23    | 398.4      | 1.1   | 398.5  | 1.1   | 420.3  | 2.2  | 542     | 11  | 0.631 | 26.52           | 1331    | 0.06376   | 0.29   | 0.5128  | 0.63  | 0.05836  | 0.5                     | 56.3     | 8.09  | 35.19    | 0.4   | 99.98 |
| Carb-C_Zr11_Pba | 0.57        | 0.296  | 0.72   | 0     | 2.749      | 0.052 | 2.84   | 0.05  | 3.95   | 0.6  | 813     | 290 | 0.765 | 99.66           | 40      | 0.0004265 | 1.9    | 0.00389 | 15    | 0.0662   | 14                      | 1.2      | 91.9  | 6.8      |       | 99.9  |
| FYC-11          | 0.52        | 0.488  | 0.72   | 1     | 10.65      | 0.13  | 10.74  | 0.13  | 39.4   | 1.6  | 2592    | 54  | 0.774 | 99.59           | 52      | 0.001654  | 1.3    | 0.0396  | 4.1   | 0.1736   | 3.3                     | 1.6      | 86.8  | 11.4     |       | 99.8  |
| G21_Z1          | 0.46        | 312    | 0.57   | 543   | 2092       | 2.1   | 2092   | 2.1   | 2093.1 | 1.7  | 2094.2  | 1.6 | 0.928 | 0.11            | 29996   | 0.38336   | 0.12   | 6.857   | 0.19  | 0.12978  | 0.083                   | 90.5     |       | 9.4      |       | 99.9  |
| G21_Z2          | 0.62        | 83.5   | 0.2    | 415   | 2090       | 2     | 2090.1 | 2     | 2092.6 | 1.8  | 2095    | 1.9 | 0.896 | 0.24            | 22114   | 0.38295   | 0.11   | 6.853   | 0.2   | 0.12984  | 0.1                     | 83.6     |       | 15.8     | 0.4   | 99.8  |
| G21_Z3          | 0.54        | 255    | 0.19   | 1369  | 2085.2     | 1.9   | 2085.3 | 1.9   | 2089.6 | 1.6  | 2093.8  | 1.6 | 0.931 | 0.41            | 74268   | 0.38191   | 0.11   | 6.829   | 0.18  | 0.12975  | 0.084                   | 93.8     |       | 6.05     |       | 99.85 |
| G32_z1          | 0.29        | 9.24   | 0.36   | 25    | 704.6      | 1.2   | 704.7  | 1.2   | 960.8  | 2.5  | 1604.7  | 5.8 | 0.706 | 56.09           | 1501    | 0.1155    | 0.17   | 1.576   | 0.41  | 0.09901  | 0.31                    | 59.02    | 6.7   | 34.25    |       | 99.97 |
| G32_z2          | 0.25        | 9.57   | 0.23   | 42    | 174.84     | 0.3   | 174.94 | 0.3   | 173.56 | 0.85 | 156     | 10  | 0.652 | -11.99          | 2634    | 0.027493  | 0.18   | 0.1864  | 0.54  | 0.0492   | 0.44                    | 54.7     | 2.04  | 43.1     |       | 99.84 |
| G32_z3          | 0.31        | 8.67   | 0.25   | 34    | 172.78     | 0.18  | 172.87 | 0.18  | 171.34 | 0.66 | 151.5   | 8.2 | 0.716 | -14.01          | 2094    | 0.027164  | 0.11   | 0.18382 | 0.42  | 0.0491   | 0.35                    | 70.5     | 4.1   | 20.9     | 4.3   | 99.8  |
| G32_z4          | 0.21        | 7.81   | 0.22   | 36    | 176.27     | 0.25  | 176.37 | 0.25  | 175.71 | 0.62 | 188.2   | 7.2 | 0.686 | -4.83           | 2268    | 0.027722  | 0.14   | 0.18893 | 0.39  | 0.04945  | 0.3                     | 80.1     | 4.02  | 15.5     |       | 99.82 |
| G32_z5          | 0.35        | 40.1   | 0.36   | 112   | 1642.2     | 1.7   | 1642.3 | 1.7   | 1806.4 | 1.8  | 2001.5  | 2.1 | 0.894 | 17.95           | 6408    | 0.29014   | 0.12   | 4.924   | 0.21  | 0.12315  | 0.11                    | 85.07    | 0.5   | 13.4     | 0.9   | 99.87 |
| GUI22-26_z1     | 1.31        | 14.6   | 0.55   | 27    | 201.43     | 0.21  | 201.5  | 0.21  | 200.9  | 0.89 | 192.1   | 9.6 | 0.774 | -4.85           | 1280    | 0.03174   | 0.1    | 0.2185  | 0.49  | 0.04996  | 0.41                    | 71.6     | 11.18 | 17.13    |       | 99.91 |
| GUI22-26_z2     | 1.1         | 9.21   | 0.44   | 21    | 201.46     | 0.57  | 201.53 | 0.57  | 200.3  | 1.2  | 187     | 13  | 0.638 | -7.74           | 1048    | 0.031745  | 0.29   | 0.2181  | 0.68  | 0.04985  | 0.54                    | 57.18    | 13.2  | 29.6     |       | 99.98 |
| GUI22-26_z3     | 1.17        | 35.2   | 0.47   | 74    | 201.06     | 0.32  | 201.13 | 0.32  | 200.59 | 0.62 | 195.1   | 5.6 | 0.754 | -3.06           | 3668    | 0.031681  | 0.16   | 0.21842 | 0.34  | 0.05002  | 0.24                    | 78.4     | 1.5   | 19.8     |       | 99.7  |
| GUI22-26_z4     | 1.16        | 9.85   | 0.28   | 35    | 201.1      | 0.32  | 201.17 | 0.32  | 199.62 | 0.97 | 182     | 10  | 0.661 | -10.39          | 1726    | 0.031687  | 0.16   | 0.2172  | 0.53  | 0.04975  | 0.44                    | 64.8     | 5.99  | 29.6     |       | 99.99 |
| GUI22-26_z5     | 1.12        | 6.5    | 0.6    | 11    | 201.52     | 0.26  | 201.59 | 0.26  | 202.2  | 1.7  | 210     | 20  | 0.67  | 4.07            | 552     | 0.031754  | 0.13   | 0.2203  | 0.93  | 0.05035  | 0.84                    | 50.8     | 41.1  | 8.02     |       | 99.92 |
| GUI22-26_z7     | 1.12        | 18.7   | 0.66   | 28    | 201.34     | 0.3   | 201.41 | 0.3   | 201.11 | 0.83 | 198.4   | 8.8 | 0.614 | -1.49           | 1426    | 0.031725  | 0.15   | 0.21903 | 0.45  | 0.0501   | 0.38                    | 75.1     | 9.5   | 15.3     |       | 99.9  |
| GUI22-26_z8     | 1.13        | 3.96   | 0.42   | 10    | 201.71     | 0.26  | 201.78 | 0.26  | 201.9  | 1.9  | 204     | 22  | 0.696 | 0.98            | 489     | 0.031785  | 0.13   | 0.22    | 1.1   | 0.05021  | 0.97                    | 45.9     | 46.6  | 7.4      |       | 99.9  |
| GUI22-26_z9     | 1.07        | 9.75   | 0.68   | 14    | 201.6      | 0.22  | 201.68 | 0.22  | 202.5  | 1.3  | 213     | 14  | 0.676 | 5.14            | 736     | 0.031768  | 0.11   | 0.2207  | 0.68  | 0.0504   | 0.61                    | 64.2     | 29.6  | 6.1      |       | 99.9  |
| MD48_z1         | 0.97        | 89.2   | 0.27   | 325   | 201.69     | 0.61  | 201.77 | 0.61  | 201.31 | 0.64 | 196.9   | 2.8 | 0.943 | -2.44           | 16884   | 0.031782  | 0.31   | 0.21928 | 0.35  | 0.050063 | 0.12                    | 85.7     |       | 14.12    |       | 99.82 |
| MD48_z4         | 0.96        | 84.2   | 0.24   | 349   | 201.27     | 0.24  | 201.35 | 0.24  | 201.17 | 0.37 | 200     | 2.6 | 0.882 | -0.66           | 17950   | 0.031715  | 0.12   | 0.21911 | 0.2   | 0.050129 | 0.11                    | 92.4     |       | 7.4      |       | 99.8  |
| MD48_z5         | 1.04        | 141    | 0.33   | 429   | 198.44     | 0.68  | 198.51 | 0.68  | 196.66 | 0.69 | 201.3   | 2.5 | 0.962 | 1.41            | 21665   | 0.03126   | 0.35   | 0.2161  | 0.38  | 0.050168 | 0.1                     | 87.2     |       | 12.7     |       | 99.9  |
| MD48_z6         | 0.93        | 48.5   | 0.21   | 226   | 201.54     | 0.34  | 201.62 | 0.34  | 201.22 | 0.48 | 197.4   | 3.7 | 0.818 | -2.09           | 11740   | 0.031758  | 0.17   | 0.21917 | 0.26  | 0.050075 | 0.15                    | 78.57    |       | 19.88    | 1.3   | 99.75 |
| NMB_03_z1       | 1.69        | 23.9   | 0.12   | 199   | 201.43     | 0.17  | 201.48 | 0.17  | 201.23 | 0.41 | 198.9   | 3.6 | 0.873 | -1.29           | 8760    | 0.03174   | 0.087  | 0.21918 | 0.23  | 0.050106 | 0.15                    | 90.13    |       | 9.56     |       | 99.69 |
| NMB_03_z2       | 1.9         | 26.6   | 0.22   | 123   | 201.32     | 0.17  | 201.37 | 0.17  | 201.04 | 0.46 | 197.7   | 4.5 | 0.781 | -1.81           | 5182    | 0.031722  | 0.088  | 0.21895 | 0.25  | 0.050082 | 0.19                    | 89.8     | 0.8   | 9.3      |       | 99.9  |
| NMB_03_z3       | 2.09        | 229    | 0.48   | 481   | 201.12     | 0.29  | 201.17 | 0.29  | 200.86 | 0.46 | 197.7   | 3.4 | 0.853 | -1.73           | 19557   | 0.031691  | 0.15   | 0.21873 | 0.25  | 0.050081 | 0.14                    | 83.5     |       | 15.8     |       | 99.3  |
| NMB_03_z4       | 2.49        | 108    | 0.66   | 163   | 200.7      | 0.38  | 200.73 | 0.38  | 199.25 | 0.6  | 182.1   | 5.3 | 0.753 | -10.2           | 6191    | 0.031623  | 0.19   | 0.21681 | 0.33  | 0.04975  | 0.22                    | 73.8     | 0.5   | 25       | 0.6   | 99.9  |
| NMB_03_z5       | 2           | 55.8   | 0.17   | 328   | 201.32     | 0.2   | 201.37 | 0.2   | 201.27 | 0.37 | 200.7   | 2.8 | 0.893 | -0.31           | 13582   | 0.031723  | 0.1    | 0.21923 | 0.2   | 0.050145 | 0.11                    | 92.4     |       | 7.4      |       | 99.8  |
| NMB_03_z7       | 1.91        | 62.4   | 0.19   | 333   | 201.17     | 0.17  | 201.22 | 0.17  | 201.15 | 0.35 | 200.9   | 2.7 | 0.925 | -0.13           | 14016   | 0.031699  | 0.084  | 0.21909 | 0.19  | 0.05015  | 0.11                    | 93.5     |       | 6.3      |       | 99.8  |
| Rad29_Zr37_Pb   | 0.33        | 0.676  | 1.19   | 1     | 2.808      | 0.035 | 2.907  | 0.034 | 3.79   | 0.39 | 685     | 200 | 0.76  | 99.59           | 51      | 0.0004357 | 1.2    | 0.00374 | 10    | 0.0623   | 9.5                     | 1.7      | 96.8  | 1.3      |       | 99.8  |
| RP113_z1        | 1.19        | 46.9   | 0.19   | 244   | 201.26     | 0.17  | 201.33 | 0.17  | 201.9  | 0.36 | 209.4   | 2.7 | 0.949 | 3.9             | 11902   | 0.031712  | 0.086  | 0.21999 | 0.2   | 0.050334 | 0.11                    | 88.4     |       | 5.7      | 5.5   | 99.6  |
| RP113_z2        | 1.08        | 28.9   | 0.38   | 76    | 201.05     | 0.18  | 201.13 | 0.18  | 201.46 | 0.46 | 206.2   | 4.3 | 0.822 | 2.51            | 3837    | 0.03168   | 0.088  | 0.21946 | 0.25  | 0.050265 | 0.18                    | 86.8     | 1.5   | 6.17     | 5.3   | 99.77 |
| RP113_z3        | 1.05        | 40.9   | 0.23   | 175   | 201.33     | 0.17  | 201.4  | 0.17  | 202.48 | 0.38 | 216     | 3.2 | 0.881 | 6.77            | 8820    | 0.031724  | 0.086  | 0.22069 | 0.21  | 0.050477 | 0.14                    | 88.3     |       | 5.77     | 5.5   | 99.57 |
| RP113_z4        | 1.27        | 62.7   | 0.67   | 93    | 201.38     | 0.18  | 201.45 | 0.18  | 202.03 | 0.45 | 209.7   | 4   | 0.838 | 3.96            | 4473    | 0.031732  | 0.093  | 0.22015 | 0.25  | 0.05034  | 0.17                    | 84.6     | 1.1   | 8.9      | 5.3   | 99.9  |
| RP113_z6        | 1.15        | 13.1   | 0.43   | 31    | 201.31     | 0.19  | 201.38 | 0.19  | 202.54 | 0.77 | 216.9   | 8   | 0.796 | 7.19            | 1530    | 0.031721  | 0.098  | 0.22076 | 0.42  | 0.       |                         |          |       |          |       |       |



Table S2: Isotope composition of total procedural blanks measured in the University of Geneva, Princeton University and ETH Zürich labs

| Date         | $^{206}\text{Pb}/^{204}\text{Pb}$ | 1 $\sigma$ (%) | $^{207}\text{Pb}/^{204}\text{Pb}$ | 1 $\sigma$ (%) | $^{208}\text{Pb}/^{204}\text{Pb}$ | 1 $\sigma$ (%) |
|--------------|-----------------------------------|----------------|-----------------------------------|----------------|-----------------------------------|----------------|
| <b>UNIGE</b> |                                   |                |                                   |                |                                   |                |
| 2008-2015    | 18.10                             | 2.10           | 15.35                             | 3.10           | 38.01                             | 3.00           |
| 2016-2021    | 17.10                             | 1.20           | 15.07                             | 0.70           | 36.17                             | 0.70           |
| <b>PU</b>    | 18.63                             | 1.71           | 15.80                             | 1.47           | 38.54                             | 0.98           |
| <b>ETH</b>   | 17.49                             | 3.32           | 14.69                             | 3.75           | 35.55                             | 3.72           |

Table S3: U-Pb isotope results of ET100 solution on the TRITON TIMS at University of Geneva over a period from 2008 to 2016.

|                         |           | Composition |        |        | Isotopic Ratios |         |         |       |         |       |          | Dates (Ma) |       |         |      |        |      |         |       |
|-------------------------|-----------|-------------|--------|--------|-----------------|---------|---------|-------|---------|-------|----------|------------|-------|---------|------|--------|------|---------|-------|
|                         |           | Pb*         | Pbc    | total  | Pb*/            | 206Pb/  | 207Pb/  |       | 207Pb/  |       | 206Pb/   |            | Corr. | 207Pb/  | ±2σ  | 207Pb/ | ±2σ  | 206Pb/  | ±2σ   |
| Fraction                | Running # | (pg) a      | (pg) b | mass   | Pbc c           | 204Pb d | 206Pb e | ±2σ % | 235U e  | ±2σ % | 238U e   | ±2σ %      | coef. | 206Pb f | abs  | 235U f | abs  | 238U f  | abs   |
| ET100 SEM #2 2008-2009  |           |             |        |        |                 |         |         |       |         |       |          |            |       |         |      |        |      |         |       |
| 4363                    | 1         | 105.0       | 0.95   | 105.97 | 110             | 7522    | 0.04805 | 0.11  | 0.10379 | 0.15  | 0.015675 | 0.09       | 0.69  | 100.4   | 2.6  | 100.27 | 0.15 | 100.263 | 0.090 |
| 4364                    | 2         | 26.4        | 0.73   | 27.10  | 36              | 2466    | 0.04804 | 0.32  | 0.10381 | 0.35  | 0.015681 | 0.08       | 0.48  | 100.0   | 7.5  | 100.29 | 0.33 | 100.299 | 0.083 |
| 4365                    | 3         | 95.4        | 1.11   | 96.54  | 86              | 5887    | 0.04804 | 0.15  | 0.10374 | 0.17  | 0.015669 | 0.07       | 0.45  | 100.3   | 3.7  | 100.23 | 0.17 | 100.223 | 0.073 |
| 4367                    | 4         | 131.0       | 7.15   | 137.67 | 18              | 1259    | 0.04817 | 0.61  | 0.10404 | 0.68  | 0.015673 | 0.20       | 0.48  | 106.0   | 15.0 | 100.50 | 0.65 | 100.250 | 0.200 |
| 4368                    | 5         | 78.9        | 0.43   | 79.37  | 183             | 12491   | 0.04802 | 0.14  | 0.10365 | 0.15  | 0.015661 | 0.07       | 0.36  | 99.4    | 3.4  | 100.14 | 0.15 | 100.175 | 0.064 |
| 4369                    | 6         | 117.0       | 0.59   | 117.47 | 197             | 13388   | 0.04812 | 0.24  | 0.10379 | 0.32  | 0.015649 | 0.13       | 0.75  | 104.2   | 5.7  | 100.27 | 0.31 | 100.100 | 0.120 |
| 4434                    | 7         | 529.0       | 1.97   | 530.83 | 268             | 18240   | 0.04803 | 0.05  | 0.10369 | 0.14  | 0.015665 | 0.12       | 0.91  | 99.7    | 1.5  | 100.18 | 0.14 | 100.200 | 0.120 |
| 4443                    | 8         | 491.0       | 1.81   | 492.68 | 271             | 18445   | 0.04806 | 0.08  | 0.10379 | 0.21  | 0.015669 | 0.17       | 0.90  | 101.3   | 2.1  | 100.27 | 0.20 | 100.220 | 0.160 |
| 4444                    | 9         | 617.0       | 1.97   | 618.92 | 314             | 21366   | 0.04803 | 0.06  | 0.10367 | 0.13  | 0.015664 | 0.10       | 0.86  | 99.5    | 1.6  | 100.16 | 0.12 | 100.192 | 0.095 |
| 4445                    | 10        | 573.0       | 1.93   | 574.75 | 297             | 20217   | 0.04806 | 0.10  | 0.10383 | 0.19  | 0.015675 | 0.12       | 0.87  | 101.3   | 2.5  | 100.30 | 0.18 | 100.260 | 0.120 |
| 4505                    | 11        | 559.0       | 1.41   | 560.06 | 396             | 26970   | 0.04806 | 0.04  | 0.10374 | 0.10  | 0.015662 | 0.07       | 0.88  | 101.1   | 1.2  | 100.22 | 0.10 | 100.180 | 0.072 |
| 4506                    | 12        | 735.0       | 1.84   | 737.10 | 399             | 27122   | 0.04803 | 0.05  | 0.10378 | 0.12  | 0.015678 | 0.08       | 0.89  | 99.9    | 1.4  | 100.26 | 0.11 | 100.280 | 0.081 |
| 4507                    | 13        | 719.0       | 1.82   | 720.96 | 395             | 26885   | 0.04802 | 0.05  | 0.10365 | 0.13  | 0.015662 | 0.10       | 0.92  | 99.2    | 1.3  | 100.14 | 0.13 | 100.180 | 0.100 |
| ET100 SEM #2 2010       |           |             |        |        |                 |         |         |       |         |       |          |            |       |         |      |        |      |         |       |
| 7013                    | 14        | 40.6        | 1.44   | 42.04  | 28              | 1942    | 0.04799 | 0.40  | 0.10355 | 0.44  | 0.015655 | 0.08       | 0.48  | 98.0    | 9.6  | 100.05 | 0.41 | 100.137 | 0.079 |
| 7014                    | 15        | 105.0       | 0.89   | 105.77 | 117             | 7987    | 0.04799 | 0.12  | 0.10356 | 0.13  | 0.015657 | 0.05       | 0.34  | 97.9    | 2.9  | 100.06 | 0.12 | 100.150 | 0.048 |
| 7049                    | 16        | 84.1        | 0.89   | 84.99  | 95              | 6464    | 0.04798 | 0.12  | 0.10362 | 0.17  | 0.015670 | 0.09       | 0.68  | 97.3    | 3.0  | 100.12 | 0.16 | 100.234 | 0.087 |
| 7802                    | 17        | 131.0       | 1.13   | 131.72 | 116             | 7913    | 0.04796 | 0.10  | 0.10357 | 0.12  | 0.015669 | 0.05       | 0.37  | 96.4    | 2.6  | 100.07 | 0.11 | 100.225 | 0.044 |
| 7806                    | 18        | 116.0       | 1.02   | 117.30 | 114             | 7770    | 0.04802 | 0.10  | 0.10367 | 0.12  | 0.015664 | 0.06       | 0.55  | 99.2    | 2.4  | 100.16 | 0.11 | 100.195 | 0.058 |
| 8001                    | 19        | 26.7        | 0.5    | 27.21  | 53              | 3649    | 0.04804 | 0.22  | 0.10369 | 0.26  | 0.015662 | 0.07       | 0.58  | 100.1   | 5.3  | 100.18 | 0.24 | 100.181 | 0.073 |
| ET100 SEM #2 June 2011  |           |             |        |        |                 |         |         |       |         |       |          |            |       |         |      |        |      |         |       |
| 8081                    | 20        | 29.9        | 0.59   | 30.45  | 50              | 3455    | 0.04806 | 0.56  | 0.10378 | 0.59  | 0.015670 | 0.06       | 0.51  | 101.0   | 13.0 | 100.26 | 0.56 | 100.230 | 0.055 |
| 8082                    | 21        | 52.2        | 0.69   | 52.93  | 76              | 5198    | 0.04809 | 0.40  | 0.10380 | 0.43  | 0.015662 | 0.10       | 0.38  | 102.5   | 9.4  | 100.28 | 0.41 | 100.180 | 0.100 |
| 8083                    | 22        | 83.6        | 0.75   | 84.35  | 111             | 7570    | 0.04803 | 0.27  | 0.10372 | 0.29  | 0.015669 | 0.06       | 0.44  | 99.7    | 6.3  | 100.20 | 0.28 | 100.225 | 0.062 |
| 8084                    | 23        | 21.5        | 0.62   | 22.08  | 35              | 2382    | 0.04825 | 0.83  | 0.10424 | 0.86  | 0.015677 | 0.07       | 0.48  | 110.0   | 20.0 | 100.69 | 0.83 | 100.275 | 0.071 |
| 8085                    | 24        | 50.5        | 0.61   | 51.13  | 82              | 5630    | 0.04803 | 0.35  | 0.10368 | 0.37  | 0.015663 | 0.05       | 0.37  | 99.7    | 8.3  | 100.17 | 0.35 | 100.186 | 0.047 |
| 8086                    | 25        | 80.8        | 0.71   | 81.49  | 114             | 7804    | 0.04806 | 0.25  | 0.10383 | 0.28  | 0.015675 | 0.07       | 0.42  | 101.3   | 6.0  | 100.30 | 0.26 | 100.264 | 0.073 |
| 8087                    | 26        | 20.3        | 0.53   | 20.82  | 38              | 2600    | 0.04811 | 0.76  | 0.10395 | 0.79  | 0.015678 | 0.07       | 0.42  | 104.0   | 18.0 | 100.41 | 0.75 | 100.281 | 0.069 |
| 8428                    | 27        | 65.3        | 0.66   | 66.01  | 99              | 6745    | 0.04800 | 0.29  | 0.10364 | 0.32  | 0.015666 | 0.07       | 0.43  | 98.3    | 7.0  | 100.13 | 0.30 | 100.204 | 0.070 |
| 8429                    | 28        | 70.3        | 1.1    | 71.36  | 64              | 4368    | 0.04802 | 0.45  | 0.10364 | 0.47  | 0.015661 | 0.06       | 0.47  | 99.0    | 11.0 | 100.13 | 0.45 | 100.176 | 0.059 |
| ET100 SEM #2 March 2012 |           |             |        |        |                 |         |         |       |         |       |          |            |       |         |      |        |      |         |       |
| 9454                    | 29        | 76.3        | 0.82   | 77.09  | 93              | 6377    | 0.04788 | 0.31  | 0.10335 | 0.32  | 0.015663 | 0.03       | 0.48  | 92.2    | 7.3  | 99.87  | 0.31 | 100.187 | 0.030 |
| 9456                    | 30        | 33.8        | 0.39   | 34.23  | 87              | 5910    | 0.04800 | 0.33  | 0.10368 | 0.35  | 0.015675 | 0.04       | 0.44  | 98.0    | 7.9  | 100.17 | 0.33 | 100.262 | 0.040 |
| 9457                    | 31        | 60.4        | 0.62   | 60.99  | 98              | 6690    | 0.04803 | 0.29  | 0.10369 | 0.31  | 0.015665 | 0.04       | 0.46  | 99.6    | 7.0  | 100.18 | 0.30 | 100.203 | 0.037 |
| 9458                    | 32        | 55.2        | 0.46   | 55.69  | 121             | 8236    | 0.04802 | 0.24  | 0.10367 | 0.25  | 0.015666 | 0.03       | 0.46  | 99.1    | 5.7  | 100.16 | 0.24 | 100.208 | 0.028 |
| 9459                    | 33        | 47.1        | 0.44   | 47.58  | 106             | 7251    | 0.04804 | 0.28  | 0.10370 | 0.31  | 0.015662 | 0.06       | 0.48  | 100.2   | 6.7  | 100.18 | 0.29 | 100.184 | 0.054 |
| 9460                    | 34        | 35.8        | 0.46   | 36.25  | 77              | 5294    | 0.04803 | 0.37  | 0.10375 | 0.39  | 0.015674 | 0.03       | 0.52  | 99.6    | 8.8  | 100.23 | 0.37 | 100.258 | 0.034 |
| 9461                    | 35        | 56.8        | 0.67   | 57.47  | 85              | 5773    | 0.04802 | 0.34  | 0.10371 | 0.35  | 0.015670 | 0.03       | 0.42  | 99.3    | 8.0  | 100.19 | 0.33 | 100.231 | 0.033 |
| 9462                    | 36        | 46.7        | 0.49   | 47.20  | 96              | 6522    | 0.04802 | 0.30  | 0.10370 | 0.32  | 0.015668 | 0.03       | 0.46  | 99.3    | 7.2  | 100.18 | 0.30 | 100.217 | 0.030 |
| ET100 SEM #3 April 2012 |           |             |        |        |                 |         |         |       |         |       |          |            |       |         |      |        |      |         |       |
| 9525                    | 37        | 59.6        | 0.48   | 60.03  | 125             | 8508    | 0.04805 | 0.23  | 0.10373 | 0.24  | 0.015665 | 0.02       | 0.50  | 100.6   | 5.5  | 100.21 | 0.23 | 100.200 | 0.019 |
| 9526                    | 38        | 70.4        | 0.51   | 70.94  | 139             | 9464    | 0.04808 | 0.21  | 0.10383 | 0.22  | 0.015670 | 0.02       | 0.48  | 102.0   | 5.0  | 100.30 | 0.21 | 100.230 | 0.019 |
| 9527                    | 39        | 55.2        | 0.47   | 55.62  | 119             | 8092    | 0.04807 | 0.25  | 0.10381 | 0.27  | 0.015671 | 0.03       | 0.56  | 101.5   | 6.1  | 100.29 | 0.26 | 100.240 | 0.031 |
| 9529                    | 40        | 59.8        | 0.46   | 60.25  | 131             | 8921    | 0.04806 | 0.22  | 0.10377 | 0.23  | 0.015667 | 0.02       | 0.54  | 101.1   | 5.2  | 100.25 | 0.22 | 100.216 | 0.017 |
| 9530                    | 41        | 97.4        | 0.63   | 98.03  | 155             | 10587   | 0.04804 | 0.19  | 0.10373 | 0.20  | 0.015668 | 0.02       | 0.55  | 100.2   | 4.5  | 100.22 | 0.19 | 100.216 | 0.021 |

|                            |    |       |      |        |     |       |         |      |         |      |          |      |      |       |     |        |      |         |       |
|----------------------------|----|-------|------|--------|-----|-------|---------|------|---------|------|----------|------|------|-------|-----|--------|------|---------|-------|
| 9538                       | 42 | 58.6  | 0.42 | 59.03  | 139 | 9496  | 0.04801 | 0.21 | 0.10364 | 0.22 | 0.015664 | 0.02 | 0.52 | 98.6  | 4.9 | 100.13 | 0.21 | 100.195 | 0.020 |
| 9539                       | 43 | 61.2  | 0.43 | 61.61  | 143 | 9755  | 0.04806 | 0.23 | 0.10376 | 0.27 | 0.015665 | 0.04 | 0.89 | 101.1 | 5.6 | 100.24 | 0.25 | 100.201 | 0.035 |
| 9540                       | 44 | 58.5  | 0.4  | 58.88  | 144 | 9852  | 0.04804 | 0.20 | 0.10372 | 0.21 | 0.015666 | 0.02 | 0.49 | 100.1 | 4.8 | 100.20 | 0.20 | 100.205 | 0.017 |
| 9541                       | 45 | 55.2  | 0.44 | 55.61  | 125 | 8538  | 0.04803 | 0.23 | 0.10371 | 0.24 | 0.015668 | 0.02 | 0.53 | 99.7  | 5.4 | 100.20 | 0.23 | 100.220 | 0.016 |
| ET100 SEM #3 November 2012 |    |       |      |        |     |       |         |      |         |      |          |      |      |       |     |        |      |         |       |
| 10148                      | 46 | 85.6  | 0.57 | 86.16  | 151 | 10301 | 0.04797 | 0.20 | 0.10355 | 0.21 | 0.015663 | 0.03 | 0.51 | 96.7  | 4.7 | 100.05 | 0.20 | 100.189 | 0.024 |
| 10149                      | 47 | 88.6  | 0.61 | 89.22  | 146 | 9947  | 0.04795 | 0.20 | 0.10349 | 0.21 | 0.015663 | 0.02 | 0.44 | 95.5  | 4.8 | 100.00 | 0.20 | 100.184 | 0.022 |
| 10156                      | 48 | 103.0 | 0.61 | 103.14 | 168 | 11469 | 0.04805 | 0.17 | 0.10374 | 0.19 | 0.015667 | 0.02 | 0.48 | 100.6 | 4.2 | 100.23 | 0.18 | 100.213 | 0.022 |
| 10215                      | 49 | 72.6  | 0.51 | 73.14  | 143 | 9773  | 0.04797 | 0.22 | 0.10360 | 0.24 | 0.015669 | 0.04 | 0.42 | 96.9  | 5.3 | 100.09 | 0.22 | 100.227 | 0.037 |
| 10216                      | 50 | 78.2  | 0.55 | 78.77  | 143 | 9776  | 0.04790 | 0.22 | 0.10344 | 0.24 | 0.015668 | 0.04 | 0.44 | 93.4  | 5.3 | 99.94  | 0.23 | 100.216 | 0.041 |
| 10217                      | 51 | 68.4  | 0.45 | 68.89  | 153 | 10450 | 0.04797 | 0.20 | 0.10360 | 0.21 | 0.015670 | 0.03 | 0.43 | 96.8  | 4.8 | 100.10 | 0.20 | 100.234 | 0.033 |
| 10226                      | 52 | 73.9  | 0.46 | 74.32  | 159 | 10853 | 0.04804 | 0.19 | 0.10374 | 0.21 | 0.015669 | 0.03 | 0.44 | 100.3 | 4.6 | 100.23 | 0.20 | 100.224 | 0.033 |
| ET100 SEM #3 April 2013    |    |       |      |        |     |       |         |      |         |      |          |      |      |       |     |        |      |         |       |
| 10355                      | 53 | 103.0 | 0.81 | 103.84 | 128 | 8716  | 0.04794 | 0.23 | 0.10350 | 0.24 | 0.015664 | 0.04 | 0.36 | 95.3  | 5.5 | 100.00 | 0.23 | 100.196 | 0.037 |
| 10356                      | 54 | 92.7  | 0.78 | 93.47  | 118 | 8084  | 0.04806 | 0.26 | 0.10378 | 0.28 | 0.015668 | 0.08 | 0.44 | 101.1 | 6.1 | 100.26 | 0.27 | 100.221 | 0.083 |
| 10357                      | 55 | 95.9  | 0.74 | 96.64  | 129 | 8814  | 0.04795 | 0.22 | 0.10346 | 0.25 | 0.015656 | 0.07 | 0.58 | 95.7  | 5.2 | 99.96  | 0.24 | 100.142 | 0.073 |
| 10358                      | 56 | 87.6  | 0.75 | 88.33  | 117 | 8001  | 0.04796 | 0.25 | 0.10354 | 0.28 | 0.015667 | 0.07 | 0.45 | 96.0  | 6.0 | 100.04 | 0.26 | 100.211 | 0.073 |
| 10359                      | 57 | 96.5  | 0.73 | 97.25  | 133 | 9044  | 0.04802 | 0.22 | 0.10372 | 0.23 | 0.015672 | 0.05 | 0.38 | 99.4  | 5.2 | 100.21 | 0.22 | 100.242 | 0.045 |
| 10360                      | 58 | 93.6  | 0.74 | 94.30  | 127 | 8676  | 0.04804 | 0.23 | 0.10370 | 0.25 | 0.015664 | 0.04 | 0.42 | 100.0 | 5.6 | 100.18 | 0.24 | 100.191 | 0.044 |
| 10361                      | 59 | 86.2  | 0.7  | 86.87  | 124 | 8434  | 0.04802 | 0.24 | 0.10378 | 0.26 | 0.015682 | 0.06 | 0.44 | 99.1  | 5.7 | 100.26 | 0.25 | 100.305 | 0.055 |
| 10362                      | 60 | 92.0  | 0.72 | 92.67  | 129 | 8772  | 0.04805 | 0.22 | 0.10369 | 0.24 | 0.015659 | 0.05 | 0.36 | 100.6 | 5.3 | 100.18 | 0.23 | 100.160 | 0.054 |
| ET100 SEM #3 July 2013     |    |       |      |        |     |       |         |      |         |      |          |      |      |       |     |        |      |         |       |
| 10551                      | 61 | 99.2  | 0.69 | 99.92  | 143 | 9765  | 0.04796 | 0.20 | 0.10350 | 0.22 | 0.015660 | 0.02 | 0.49 | 96.0  | 4.9 | 100.00 | 0.21 | 100.171 | 0.023 |
| 10552                      | 62 | 93.3  | 0.75 | 94.10  | 124 | 8473  | 0.04807 | 0.23 | 0.10381 | 0.25 | 0.015670 | 0.02 | 0.52 | 101.5 | 5.6 | 100.28 | 0.24 | 100.232 | 0.022 |
| 10553                      | 63 | 128.0 | 0.67 | 128.34 | 192 | 13079 | 0.04804 | 0.15 | 0.10372 | 0.17 | 0.015666 | 0.02 | 0.49 | 100.1 | 3.7 | 100.20 | 0.16 | 100.207 | 0.020 |
| 10554                      | 64 | 94.6  | 0.62 | 95.23  | 154 | 10479 | 0.04799 | 0.19 | 0.10361 | 0.20 | 0.015667 | 0.02 | 0.50 | 97.5  | 4.6 | 100.10 | 0.19 | 100.214 | 0.020 |
| 10556                      | 65 | 83.1  | 0.6  | 83.69  | 138 | 9405  | 0.04803 | 0.21 | 0.10366 | 0.23 | 0.015661 | 0.03 | 0.49 | 99.5  | 5.0 | 100.15 | 0.21 | 100.175 | 0.028 |
| 10557                      | 66 | 80.1  | 0.54 | 80.69  | 149 | 10132 | 0.04803 | 0.19 | 0.10369 | 0.20 | 0.015666 | 0.02 | 0.43 | 99.5  | 4.6 | 100.18 | 0.19 | 100.207 | 0.023 |
| 10842                      | 67 | 68.6  | 0.39 | 68.99  | 177 | 12087 | 0.04781 | 0.19 | 0.10314 | 0.22 | 0.015653 | 0.07 | 0.51 | 88.9  | 4.5 | 99.67  | 0.21 | 100.122 | 0.071 |
| 10844                      | 68 | 74.2  | 0.46 | 74.61  | 162 | 11074 | 0.04772 | 0.24 | 0.10298 | 0.27 | 0.015660 | 0.06 | 0.52 | 84.1  | 5.8 | 99.52  | 0.26 | 100.170 | 0.061 |
| ET100 SEM #3 May 2014      |    |       |      |        |     |       |         |      |         |      |          |      |      |       |     |        |      |         |       |
| 11120                      | 69 | 47.6  | 0.23 | 47.84  | 205 | 13980 | 0.04798 | 0.16 | 0.10358 | 0.17 | 0.015666 | 0.03 | 0.39 | 97.1  | 3.8 | 100.08 | 0.16 | 100.206 | 0.027 |
| 11130                      | 70 | 82.2  | 0.35 | 82.59  | 238 | 16196 | 0.04806 | 0.14 | 0.10374 | 0.14 | 0.015662 | 0.02 | 0.26 | 101.1 | 3.3 | 100.22 | 0.14 | 100.182 | 0.023 |
| 11135                      | 71 | 58.9  | 0.29 | 59.18  | 205 | 13988 | 0.04799 | 0.16 | 0.10359 | 0.16 | 0.015664 | 0.03 | 0.16 | 97.4  | 3.8 | 100.09 | 0.15 | 100.196 | 0.027 |
| 11139                      | 72 | 68.3  | 0.29 | 68.59  | 232 | 15827 | 0.04800 | 0.18 | 0.10362 | 0.22 | 0.015663 | 0.04 | 0.80 | 98.3  | 4.4 | 100.11 | 0.21 | 100.186 | 0.042 |
| 11217                      | 73 | 68.4  | 0.29 | 68.68  | 238 | 16257 | 0.04804 | 0.13 | 0.10373 | 0.15 | 0.015667 | 0.04 | 0.50 | 100.3 | 3.1 | 100.22 | 0.14 | 100.212 | 0.037 |
| 11229                      | 74 | 55.3  | 0.26 | 55.59  | 211 | 14377 | 0.04801 | 0.15 | 0.10365 | 0.16 | 0.015666 | 0.02 | 0.38 | 98.7  | 3.5 | 100.14 | 0.15 | 100.207 | 0.024 |
| 11232                      | 75 | 48.6  | 0.24 | 48.86  | 203 | 13874 | 0.04801 | 0.16 | 0.10361 | 0.17 | 0.015659 | 0.03 | 0.44 | 98.8  | 3.8 | 100.11 | 0.16 | 100.163 | 0.031 |
| 11247                      | 76 | 49.2  | 0.25 | 49.42  | 198 | 13517 | 0.04792 | 0.16 | 0.10344 | 0.17 | 0.015663 | 0.03 | 0.48 | 94.3  | 3.8 | 99.95  | 0.16 | 100.184 | 0.029 |
| 11248                      | 77 | 48.0  | 0.23 | 48.20  | 212 | 14487 | 0.04804 | 0.15 | 0.10370 | 0.17 | 0.015662 | 0.03 | 0.54 | 100.3 | 3.6 | 100.18 | 0.16 | 100.178 | 0.028 |
| ET100 SEM #3 October 2014  |    |       |      |        |     |       |         |      |         |      |          |      |      |       |     |        |      |         |       |
| 11489                      | 78 | 102.0 | 0.49 | 102.87 | 209 | 14242 | 0.04804 | 0.14 | 0.10376 | 0.16 | 0.015671 | 0.04 | 0.43 | 100.4 | 3.4 | 100.24 | 0.15 | 100.240 | 0.042 |
| 11490                      | 79 | 70.9  | 0.37 | 71.31  | 192 | 13091 | 0.04802 | 0.17 | 0.10362 | 0.20 | 0.015659 | 0.06 | 0.48 | 99.1  | 4.2 | 100.12 | 0.19 | 100.160 | 0.057 |
| 11491                      | 80 | 27.7  | 0.15 | 27.83  | 182 | 12396 | 0.04795 | 0.23 | 0.10354 | 0.27 | 0.015667 | 0.06 | 0.63 | 95.8  | 5.6 | 100.03 | 0.26 | 100.215 | 0.059 |
| ET100 SEM #4 December 2014 |    |       |      |        |     |       |         |      |         |      |          |      |      |       |     |        |      |         |       |
| 11542                      | 81 | 59.9  | 0.52 | 60.47  | 115 | 7845  | 0.04795 | 0.27 | 0.10348 | 0.28 | 0.015660 | 0.05 | 0.39 | 95.7  | 6.4 | 99.99  | 0.27 | 100.167 | 0.046 |
| 11543                      | 82 | 72.8  | 0.39 | 73.24  | 185 | 12634 | 0.04798 | 0.17 | 0.10357 | 0.18 | 0.015663 | 0.03 | 0.46 | 97.1  | 4.0 | 100.06 | 0.17 | 100.190 | 0.027 |
| 11544                      | 83 | 127.0 | 0.62 | 127.38 | 204 | 13925 | 0.04803 | 0.18 | 0.10370 | 0.22 | 0.015665 | 0.05 | 0.81 | 99.8  | 4.4 | 100.19 | 0.21 | 100.202 | 0.047 |
| 11545                      | 84 | 31.6  | 0.21 | 31.76  | 153 | 10439 | 0.04797 | 0.21 | 0.10350 | 0.23 | 0.015655 | 0.03 | 0.57 | 96.8  | 5.1 | 100.00 | 0.22 | 100.134 | 0.030 |

|                                                                                                                                             |     |       |      |        |     |       |         |      |         |      |          |      |       |       |     |        |      |         |       |
|---------------------------------------------------------------------------------------------------------------------------------------------|-----|-------|------|--------|-----|-------|---------|------|---------|------|----------|------|-------|-------|-----|--------|------|---------|-------|
| 11546                                                                                                                                       | 85  | 123.0 | 0.63 | 123.95 | 194 | 13245 | 0.04802 | 0.17 | 0.10363 | 0.19 | 0.015658 | 0.04 | 0.61  | 99.3  | 4.0 | 100.12 | 0.18 | 100.157 | 0.035 |
| 11547                                                                                                                                       | 86  | 38.6  | 0.31 | 38.92  | 126 | 8582  | 0.04792 | 0.27 | 0.10351 | 0.29 | 0.015675 | 0.05 | 0.51  | 94.1  | 6.4 | 100.02 | 0.28 | 100.264 | 0.045 |
| 11549                                                                                                                                       | 87  | 81.3  | 0.44 | 81.74  | 186 | 12711 | 0.04802 | 0.16 | 0.10369 | 0.18 | 0.015669 | 0.03 | 0.39  | 99.0  | 4.0 | 100.18 | 0.17 | 100.225 | 0.033 |
| 11569                                                                                                                                       | 88  | 116.0 | 0.9  | 116.69 | 128 | 8732  | 0.04803 | 0.24 | 0.10372 | 0.26 | 0.015668 | 0.06 | 0.48  | 99.9  | 5.7 | 100.21 | 0.25 | 100.220 | 0.061 |
| 11570                                                                                                                                       | 89  | 86.5  | 0.67 | 87.13  | 129 | 8810  | 0.04795 | 0.24 | 0.10341 | 0.27 | 0.015648 | 0.09 | 0.45  | 95.7  | 5.7 | 99.92  | 0.25 | 100.094 | 0.089 |
| 11582                                                                                                                                       | 90  | 89.2  | 0.41 | 89.58  | 216 | 14703 | 0.04793 | 0.15 | 0.10346 | 0.16 | 0.015661 | 0.04 | 0.46  | 94.8  | 3.6 | 99.96  | 0.16 | 100.177 | 0.037 |
| 11586                                                                                                                                       | 91  | 103.0 | 0.45 | 103.64 | 230 | 15676 | 0.04804 | 0.15 | 0.10375 | 0.17 | 0.015671 | 0.03 | 0.56  | 100.1 | 3.6 | 100.23 | 0.16 | 100.235 | 0.034 |
| 11590                                                                                                                                       | 92  | 78.5  | 0.35 | 78.88  | 226 | 15406 | 0.04799 | 0.14 | 0.10357 | 0.15 | 0.015658 | 0.03 | 0.46  | 97.9  | 3.4 | 100.06 | 0.15 | 100.153 | 0.031 |
| 11594                                                                                                                                       | 93  | 80.7  | 0.43 | 81.08  | 187 | 12782 | 0.04790 | 0.20 | 0.10338 | 0.20 | 0.015659 | 0.04 | -0.01 | 93.5  | 4.8 | 99.89  | 0.19 | 100.160 | 0.043 |
| 11600                                                                                                                                       | 94  | 93.7  | 0.45 | 94.10  | 209 | 14222 | 0.04794 | 0.16 | 0.10348 | 0.17 | 0.015663 | 0.03 | 0.42  | 95.2  | 3.9 | 99.99  | 0.16 | 100.185 | 0.029 |
| ET100 SEM #4 April 2015                                                                                                                     |     |       |      |        |     |       |         |      |         |      |          |      |       |       |     |        |      |         |       |
| 11840                                                                                                                                       | 95  | 29.9  | 0.22 | 30.10  | 133 | 8595  | 0.04796 | 0.10 | 0.10347 | 0.11 | 0.015656 | 0.03 | 0.52  | 96.0  | 2.4 | 99.98  | 0.11 | 100.144 | 0.025 |
| 11841                                                                                                                                       | 96  | 24.9  | 0.21 | 25.13  | 116 | 7512  | 0.04799 | 0.09 | 0.10351 | 0.10 | 0.015651 | 0.02 | 0.30  | 97.6  | 2.3 | 100.01 | 0.10 | 100.114 | 0.022 |
| 11842                                                                                                                                       | 97  | 31.9  | 0.25 | 32.18  | 128 | 8270  | 0.04796 | 0.09 | 0.10348 | 0.10 | 0.015657 | 0.02 | 0.08  | 96.0  | 2.3 | 99.99  | 0.09 | 100.152 | 0.024 |
| 11844                                                                                                                                       | 98  | 26.5  | 0.21 | 26.70  | 125 | 8064  | 0.04811 | 0.13 | 0.10377 | 0.13 | 0.015650 | 0.04 | 0.01  | 103.7 | 3.1 | 100.25 | 0.12 | 100.104 | 0.036 |
| 11919                                                                                                                                       | 99  | 32.1  | 0.16 | 32.22  | 198 | 12781 | 0.04797 | 0.07 | 0.10352 | 0.09 | 0.015658 | 0.02 | 0.47  | 96.8  | 1.8 | 100.02 | 0.08 | 100.156 | 0.020 |
| 11921                                                                                                                                       | 100 | 36.8  | 0.19 | 37.02  | 198 | 12796 | 0.04803 | 0.08 | 0.10364 | 0.10 | 0.015657 | 0.03 | 0.56  | 99.8  | 2.1 | 100.13 | 0.10 | 100.147 | 0.026 |
| 11922                                                                                                                                       | 101 | 36.0  | 0.17 | 36.18  | 212 | 13644 | 0.04808 | 0.08 | 0.10374 | 0.09 | 0.015656 | 0.02 | 0.41  | 102.0 | 2.0 | 100.22 | 0.08 | 100.143 | 0.019 |
| 11924                                                                                                                                       | 102 | 46.6  | 0.32 | 46.88  | 143 | 9247  | 0.04803 | 0.09 | 0.10365 | 0.11 | 0.015658 | 0.03 | 0.51  | 99.7  | 2.3 | 100.14 | 0.11 | 100.157 | 0.031 |
| 11985                                                                                                                                       | 103 | 72.2  | 0.32 | 72.49  | 223 | 14372 | 0.04806 | 0.06 | 0.10372 | 0.09 | 0.015660 | 0.04 | 0.65  | 101.2 | 1.6 | 100.21 | 0.09 | 100.166 | 0.042 |
| 11986                                                                                                                                       | 104 | 74.0  | 0.33 | 74.37  | 228 | 14687 | 0.04804 | 0.08 | 0.10376 | 0.10 | 0.015670 | 0.05 | 0.65  | 100.4 | 1.9 | 100.24 | 0.10 | 100.230 | 0.045 |
| 11987                                                                                                                                       | 105 | 66.3  | 0.29 | 66.60  | 229 | 14736 | 0.04809 | 0.08 | 0.10372 | 0.10 | 0.015648 | 0.04 | 0.63  | 102.9 | 1.9 | 100.20 | 0.10 | 100.089 | 0.037 |
| 11989                                                                                                                                       | 106 | 65.9  | 0.29 | 66.19  | 227 | 14642 | 0.04808 | 0.08 | 0.10368 | 0.10 | 0.015649 | 0.04 | 0.46  | 101.9 | 2.1 | 100.17 | 0.09 | 100.097 | 0.036 |
| 11990                                                                                                                                       | 107 | 73.1  | 0.34 | 73.45  | 214 | 13796 | 0.04805 | 0.10 | 0.10365 | 0.12 | 0.015653 | 0.04 | 0.52  | 100.5 | 2.5 | 100.14 | 0.11 | 100.122 | 0.040 |
| 11991                                                                                                                                       | 108 | 73.5  | 0.38 | 73.92  | 192 | 12395 | 0.04806 | 0.08 | 0.10363 | 0.05 | 0.015645 | 0.03 | -1.54 | 101.2 | 2.0 | 100.12 | 0.05 | 100.071 | 0.026 |
| 11995                                                                                                                                       | 109 | 64.8  | 0.43 | 65.22  | 151 | 9744  | 0.04812 | 0.10 | 0.10375 | 0.12 | 0.015644 | 0.03 | 0.82  | 104.3 | 2.4 | 100.23 | 0.12 | 100.064 | 0.032 |
| ET100 SEM #4 June 2015                                                                                                                      |     |       |      |        |     |       |         |      |         |      |          |      |       |       |     |        |      |         |       |
| 11998                                                                                                                                       | 110 | 43.0  | 0.27 | 43.29  | 161 | 10366 | 0.04802 | 0.07 | 0.10359 | 0.13 | 0.015652 | 0.09 | 0.78  | 99.4  | 1.9 | 100.09 | 0.12 | 100.120 | 0.092 |
| 11999                                                                                                                                       | 111 | 41.9  | 0.26 | 42.17  | 160 | 10315 | 0.04799 | 0.08 | 0.10350 | 0.10 | 0.015651 | 0.03 | 0.64  | 97.5  | 1.9 | 100.01 | 0.09 | 100.110 | 0.030 |
| 12000                                                                                                                                       | 112 | 39.5  | 0.26 | 39.76  | 154 | 9915  | 0.04794 | 0.12 | 0.10346 | 0.14 | 0.015658 | 0.04 | 0.57  | 95.4  | 2.9 | 99.96  | 0.13 | 100.155 | 0.036 |
| 12003                                                                                                                                       | 113 | 41.3  | 0.26 | 41.60  | 162 | 10434 | 0.04810 | 0.09 | 0.10371 | 0.12 | 0.015645 | 0.03 | 0.64  | 103.0 | 2.3 | 100.19 | 0.11 | 100.074 | 0.034 |
| 12004                                                                                                                                       | 114 | 38.7  | 0.24 | 38.93  | 161 | 10398 | 0.04805 | 0.07 | 0.10362 | 0.10 | 0.015649 | 0.04 | 0.68  | 100.6 | 1.8 | 100.12 | 0.09 | 100.097 | 0.037 |
| 12005                                                                                                                                       | 115 | 46.6  | 0.29 | 46.86  | 160 | 10331 | 0.04801 | 0.10 | 0.10358 | 0.13 | 0.015655 | 0.04 | 0.72  | 98.7  | 2.5 | 100.08 | 0.12 | 100.136 | 0.037 |
| 12006                                                                                                                                       | 116 | 36.7  | 0.24 | 36.91  | 153 | 9844  | 0.04806 | 0.11 | 0.10366 | 0.13 | 0.015652 | 0.03 | 0.71  | 100.9 | 2.7 | 100.15 | 0.13 | 100.116 | 0.034 |
| 12015                                                                                                                                       | 117 | 53.8  | 0.32 | 54.08  | 167 | 10783 | 0.04800 | 0.07 | 0.10355 | 0.10 | 0.015652 | 0.03 | 0.57  | 98.3  | 1.9 | 100.05 | 0.09 | 100.120 | 0.031 |
| 12018                                                                                                                                       | 118 | 52.3  | 0.32 | 52.62  | 163 | 10521 | 0.04805 | 0.09 | 0.10367 | 0.11 | 0.015655 | 0.03 | 0.54  | 100.6 | 2.2 | 100.16 | 0.10 | 100.139 | 0.033 |
| 12256                                                                                                                                       | 119 | 25.3  | 0.22 | 25.52  | 113 | 7299  | 0.04802 | 0.08 | 0.10357 | 0.10 | 0.015649 | 0.02 | 0.56  | 99.3  | 2.1 | 100.07 | 0.09 | 100.099 | 0.019 |
| 12257                                                                                                                                       | 120 | 40.0  | 0.27 | 40.23  | 150 | 9697  | 0.04804 | 0.08 | 0.10361 | 0.09 | 0.015649 | 0.03 | 0.55  | 100.2 | 1.9 | 100.10 | 0.09 | 100.095 | 0.025 |
| ET100 SEM #5 December 2015                                                                                                                  |     |       |      |        |     |       |         |      |         |      |          |      |       |       |     |        |      |         |       |
| 12345                                                                                                                                       | 121 | 37.1  | 0.23 | 37.37  | 159 | 10247 | 0.04804 | 0.10 | 0.10365 | 0.23 | 0.015657 | 0.20 | 0.90  | 100.0 | 2.4 | 100.14 | 0.22 | 100.150 | 0.200 |
| 12346                                                                                                                                       | 122 | 44.2  | 0.27 | 44.42  | 167 | 10745 | 0.04802 | 0.09 | 0.10353 | 0.11 | 0.015644 | 0.05 | 0.57  | 99.2  | 2.2 | 100.03 | 0.10 | 100.065 | 0.050 |
| 12347                                                                                                                                       | 123 | 36.4  | 0.22 | 36.64  | 162 | 10481 | 0.04811 | 0.10 | 0.10373 | 0.14 | 0.015644 | 0.06 | 0.68  | 103.7 | 2.6 | 100.21 | 0.13 | 100.067 | 0.055 |
| 12348                                                                                                                                       | 124 | 36.6  | 0.27 | 36.89  | 137 | 8830  | 0.04815 | 0.11 | 0.10389 | 0.15 | 0.015657 | 0.07 | 0.65  | 105.3 | 2.7 | 100.36 | 0.14 | 100.151 | 0.068 |
| 12349                                                                                                                                       | 125 | 37.5  | 0.24 | 37.71  | 159 | 10243 | 0.04807 | 0.10 | 0.10366 | 0.17 | 0.015646 | 0.10 | 0.82  | 101.8 | 2.4 | 100.15 | 0.16 | 100.080 | 0.100 |
| 12350                                                                                                                                       | 126 | 37.8  | 0.22 | 38.02  | 173 | 11134 | 0.04814 | 0.11 | 0.10390 | 0.14 | 0.015661 | 0.05 | 0.66  | 105.0 | 2.7 | 100.37 | 0.14 | 100.174 | 0.051 |
| 12351far                                                                                                                                    | 127 | 36.5  | 0.22 | 36.68  | 164 | 10549 | 0.04807 | 0.08 | 0.10373 | 0.11 | 0.015657 | 0.04 | 0.58  | 101.7 | 2.1 | 100.21 | 0.10 | 100.150 | 0.036 |
| 12352                                                                                                                                       | 128 | 38.6  | 0.23 | 38.83  | 170 | 10939 | 0.04813 | 0.08 | 0.10385 | 0.09 | 0.015657 | 0.03 | 0.35  | 104.5 | 2.1 | 100.33 | 0.09 | 100.149 | 0.032 |
| 12353                                                                                                                                       | 129 | 37.0  | 0.22 | 37.20  | 169 | 10893 | 0.04812 | 0.08 | 0.10380 | 0.10 | 0.015654 | 0.03 | 0.64  | 103.9 | 2.0 | 100.28 | 0.10 | 100.131 | 0.034 |
| 12353s                                                                                                                                      | 130 | 37.0  | 0.22 | 37.20  | 169 | 10893 | 0.04812 | 0.08 | 0.10382 | 0.12 | 0.015656 | 0.07 | 0.71  | 103.9 | 2.0 | 100.29 | 0.11 | 100.142 | 0.069 |
| 12354                                                                                                                                       | 131 | 39.8  | 0.23 | 40.04  | 170 | 10949 | 0.04809 | 0.09 | 0.10375 | 0.11 | 0.015654 | 0.03 | 0.61  | 102.7 | 2.2 | 100.24 | 0.10 | 100.133 | 0.028 |
| a Total mass of radiogenic Pb.                                                                                                              |     |       |      |        |     |       |         |      |         |      |          |      |       |       |     |        |      |         |       |
| b Total mass of common Pb.                                                                                                                  |     |       |      |        |     |       |         |      |         |      |          |      |       |       |     |        |      |         |       |
| c Ratio of radiogenic Pb (including 208Pb) to common Pb.                                                                                    |     |       |      |        |     |       |         |      |         |      |          |      |       |       |     |        |      |         |       |
| d Measured ratio corrected for fractionation and spike contribution only.                                                                   |     |       |      |        |     |       |         |      |         |      |          |      |       |       |     |        |      |         |       |
| e Measured ratios corrected for fractionation, tracer and blank.                                                                            |     |       |      |        |     |       |         |      |         |      |          |      |       |       |     |        |      |         |       |
| f Isotopic dates calculated using $\lambda_{238} = 1.55125E-10$ (Jaffey et al. 1971) and $\lambda_{235} = 9.8485E-10$ (Jaffey et al. 1971). |     |       |      |        |     |       |         |      |         |      |          |      |       |       |     |        |      |         |       |

Table S4: U-Pb isotope results of ET100 solution during 5 intercalibration exercises between TRITON and PHOENIX TIMS University of Geneva between 2016 and 2019

|                                      |           | Composition |            |                 |           | Isotopic Ratios |               |       |         |       |              | Dates (Ma) |             |               |         |        |         |              |         |                                                         |
|--------------------------------------|-----------|-------------|------------|-----------------|-----------|-----------------|---------------|-------|---------|-------|--------------|------------|-------------|---------------|---------|--------|---------|--------------|---------|---------------------------------------------------------|
| Fraction                             | Running # | Pb* (pg) a  | Pbc (pg) b | total mass (pg) | Pb*/Pbc c | 206Pb/204Pb d   | 207Pb/206Pb e | ±2σ % | 235U e  | ±2σ % | 206Pb/238U e | ±2σ %      | Corr. coef. | 207Pb/206Pb f | ±2σ abs | 235U f | ±2σ abs | 206Pb/238U f | ±2σ abs | Mean age calculations                                   |
| <b>ET2535 spike bottle #1</b>        |           |             |            |                 |           |                 |               |       |         |       |              |            |             |               |         |        |         |              |         |                                                         |
| ET100_2535_b1_TRITON_Jan2016         |           |             |            |                 |           |                 |               |       |         |       |              |            |             |               |         |        |         |              |         |                                                         |
| 12943                                | 132       | 41.4        | 0.25       | 41.69           | 167       | 10908           | 0.04812       | 0.09  | 0.10375 | 0.11  | 0.015644     | 0.03       | 0.62        | 104.1         | 2.2     | 100.23 | 0.10    | 100.068      | 0.027   | 100.044 ± 0.012 Ma [X] error, 2σ<br>MSWD = 1.3, N = 8   |
| 12944                                | 133       | 40.5        | 0.25       | 40.72           | 160       | 10450           | 0.04803       | 0.08  | 0.10353 | 0.11  | 0.015639     | 0.02       | 0.76        | 99.8          | 2.1     | 100.03 | 0.10    | 100.037      | 0.024   |                                                         |
| 12945                                | 134       | 38.5        | 0.25       | 38.72           | 155       | 10099           | 0.04803       | 0.12  | 0.10350 | 0.13  | 0.015638     | 0.03       | 0.35        | 99.5          | 2.9     | 100.01 | 0.12    | 100.026      | 0.029   |                                                         |
| 12947                                | 135       | 35.4        | 0.24       | 35.66           | 146       | 9514            | 0.04800       | 0.10  | 0.10345 | 0.12  | 0.015637     | 0.04       | 0.62        | 98.4          | 2.4     | 99.95  | 0.12    | 100.020      | 0.039   |                                                         |
| 12948                                | 136       | 33.3        | 0.22       | 33.56           | 151       | 9871            | 0.04806       | 0.22  | 0.10360 | 0.25  | 0.015641     | 0.03       | 0.90        | 101.3         | 5.2     | 100.10 | 0.24    | 100.045      | 0.033   |                                                         |
| 12950                                | 137       | 44.5        | 0.28       | 44.82           | 156       | 10214           | 0.04801       | 0.16  | 0.10349 | 0.17  | 0.015640     | 0.08       | 0.28        | 98.7          | 3.9     | 99.99  | 0.16    | 100.042      | 0.080   |                                                         |
| 12952                                | 138       | 41.2        | 0.26       | 41.46           | 156       | 10204           | 0.04798       | 0.10  | 0.10346 | 0.13  | 0.015645     | 0.05       | 0.65        | 97.4          | 2.5     | 99.97  | 0.12    | 100.074      | 0.047   |                                                         |
| 12953                                | 139       | 54.4        | 0.31       | 54.68           | 177       | 11559           | 0.04810       | 0.09  | 0.10370 | 0.12  | 0.015643     | 0.05       | 0.63        | 103.2         | 2.3     | 100.19 | 0.11    | 100.060      | 0.045   |                                                         |
| ET100_2535_b1_PHOENIX_DALY_Jan2016   |           |             |            |                 |           |                 |               |       |         |       |              |            |             |               |         |        |         |              |         |                                                         |
| P89                                  | 140       | 32.1        | 0.57       | 32.63           | 56        | 3697            | 0.04792       | 0.13  | 0.10329 | 0.15  | 0.015642     | 0.03       | 0.52        | 94.0          | 3.2     | 99.81  | 0.14    | 100.054      | 0.033   | 100.057 ± 0.009 Ma [X] error, 2σ<br>MSWD = 1.3, N = 8   |
| P90                                  | 141       | 41.2        | 0.52       | 41.72           | 79        | 5171            | 0.04793       | 0.10  | 0.10335 | 0.11  | 0.015647     | 0.03       | 0.30        | 94.7          | 2.4     | 99.87  | 0.10    | 100.083      | 0.026   |                                                         |
| P91                                  | 142       | 43.4        | 0.56       | 43.99           | 78        | 5090            | 0.04801       | 0.10  | 0.10351 | 0.11  | 0.015644     | 0.03       | 0.40        | 98.7          | 2.4     | 100.01 | 0.10    | 100.069      | 0.026   |                                                         |
| P92                                  | 143       | 54.7        | 0.50       | 55.22           | 109       | 7125            | 0.04799       | 0.07  | 0.10346 | 0.08  | 0.015642     | 0.02       | 0.42        | 97.8          | 1.8     | 99.96  | 0.08    | 100.054      | 0.024   |                                                         |
| P93                                  | 144       | 47.6        | 0.49       | 48.09           | 97        | 6354            | 0.04800       | 0.07  | 0.10349 | 0.09  | 0.015644     | 0.02       | 0.47        | 98.4          | 1.9     | 100.00 | 0.09    | 100.065      | 0.024   |                                                         |
| P95                                  | 145       | 45.0        | 0.32       | 45.34           | 140       | 9161            | 0.04793       | 0.06  | 0.10331 | 0.08  | 0.015639     | 0.04       | 0.56        | 94.9          | 1.6     | 99.83  | 0.08    | 100.035      | 0.044   |                                                         |
| P96                                  | 146       | 46.2        | 0.34       | 46.55           | 134       | 8752            | 0.04796       | 0.06  | 0.10337 | 0.08  | 0.015639     | 0.02       | 0.46        | 96.2          | 1.7     | 99.88  | 0.07    | 100.036      | 0.024   |                                                         |
| P97                                  | 147       | 45.9        | 0.32       | 46.25           | 144       | 9429            | 0.04797       | 0.06  | 0.10342 | 0.09  | 0.015644     | 0.06       | 0.63        | 96.6          | 1.6     | 99.93  | 0.08    | 100.065      | 0.056   |                                                         |
| P98                                  | 148       | 43.7        | 0.29       | 43.98           | 152       | 9915            | 0.04797       | 0.06  | 0.10341 | 0.07  | 0.015641     | 0.02       | 0.32        | 96.8          | 1.5     | 99.92  | 0.06    | 100.047      | 0.023   |                                                         |
| ET100_2535_b1_PHOENIX_FARall_Jan2016 |           |             |            |                 |           |                 |               |       |         |       |              |            |             |               |         |        |         |              |         |                                                         |
| 3/2_16                               | 149       | 51.2        | 0.40       | 51.61           | 128       | 8347            | 0.04814       | 0.18  | 0.10377 | 0.19  | 0.015642     | 0.04       | 0.35        | 105.0         | 4.3     | 100.25 | 0.18    | 100.053      | 0.036   | 100.046 ± 0.010 Ma [X] error, 2σ<br>MSWD = 1.0, N = 9   |
| 3/2_17                               | 150       | 41.2        | 0.40       | 41.63           | 102       | 6676            | 0.04810       | 0.19  | 0.10368 | 0.20  | 0.015639     | 0.03       | 0.16        | 103.2         | 4.6     | 100.16 | 0.19    | 100.036      | 0.031   |                                                         |
| 3/2_18                               | 151       | 46.7        | 0.42       | 47.14           | 112       | 7296            | 0.04819       | 0.15  | 0.10386 | 0.16  | 0.015638     | 0.03       | 0.31        | 107.5         | 3.6     | 100.33 | 0.15    | 100.032      | 0.028   |                                                         |
| 3/2_19                               | 152       | 49.9        | 0.43       | 50.32           | 116       | 7594            | 0.04817       | 0.09  | 0.10383 | 0.10  | 0.015641     | 0.03       | 0.32        | 106.4         | 2.3     | 100.30 | 0.10    | 100.049      | 0.025   |                                                         |
| 3/2_20                               | 153       | 49.8        | 0.40       | 50.19           | 125       | 8179            | 0.04810       | 0.13  | 0.10368 | 0.14  | 0.015642     | 0.03       | 0.29        | 102.9         | 3.1     | 100.17 | 0.13    | 100.055      | 0.027   |                                                         |
| 3/2_21                               | 154       | 47.8        | 0.40       | 48.21           | 119       | 7755            | 0.04823       | 0.15  | 0.10395 | 0.16  | 0.015638     | 0.03       | 0.24        | 109.6         | 3.6     | 100.41 | 0.15    | 100.028      | 0.028   |                                                         |
| 3/2_22                               | 155       | 51.6        | 0.41       | 51.99           | 125       | 8154            | 0.04797       | 0.17  | 0.10342 | 0.18  | 0.015644     | 0.03       | 0.31        | 96.7          | 4.1     | 99.93  | 0.17    | 100.064      | 0.029   |                                                         |
| 3/2_23                               | 156       | 47.5        | 0.49       | 48.03           | 97        | 6310            | 0.04855       | 0.16  | 0.10463 | 0.17  | 0.015637     | 0.04       | 0.37        | 125.1         | 3.8     | 101.04 | 0.16    | 100.024      | 0.040   |                                                         |
| 3/2_24                               | 157       | 49.9        | 0.42       | 50.31           | 118       | 7723            | 0.04810       | 0.14  | 0.10369 | 0.15  | 0.015643     | 0.03       | 0.32        | 102.9         | 3.4     | 100.18 | 0.14    | 100.062      | 0.027   |                                                         |
| <b>ET2535 spike bottle #2</b>        |           |             |            |                 |           |                 |               |       |         |       |              |            |             |               |         |        |         |              |         |                                                         |
| ET100_2535_b2_TRITON_nov2016         |           |             |            |                 |           |                 |               |       |         |       |              |            |             |               |         |        |         |              |         |                                                         |
| 12985                                | 158       | 51.1        | 0.27       | 51.40           | 190       | 12393           | 0.04798       | 0.08  | 0.10358 | 0.12  | 0.015664     | 0.06       | 0.67        | 97.3          | 2.1     | 100.08 | 0.11    | 100.191      | 0.058   | 100.243 ± 0.012 Ma [X] error, 2σ<br>MSWD = 5.1, N = 12  |
| 12986                                | 159       | 36.8        | 0.21       | 37.03           | 175       | 11426           | 0.04802       | 0.16  | 0.10366 | 0.19  | 0.015663     | 0.06       | 0.63        | 99.1          | 3.8     | 100.15 | 0.18    | 100.190      | 0.059   |                                                         |
| 12987                                | 160       | 49.3        | 0.27       | 49.57           | 186       | 12107           | 0.04809       | 0.11  | 0.10388 | 0.14  | 0.015675     | 0.05       | 0.68        | 102.6         | 2.6     | 100.36 | 0.13    | 100.261      | 0.044   |                                                         |
| 12987f                               | 161       | 49.3        | 0.27       | 49.57           | 186       | 12107           | 0.04809       | 0.11  | 0.10390 | 0.14  | 0.015677     | 0.05       | 0.67        | 102.6         | 2.6     | 100.37 | 0.13    | 100.273      | 0.050   |                                                         |
| 12987s                               | 162       | 49.3        | 0.27       | 49.57           | 186       | 12107           | 0.04809       | 0.11  | 0.10391 | 0.15  | 0.015679     | 0.08       | 0.71        | 102.6         | 2.6     | 100.38 | 0.15    | 100.287      | 0.080   |                                                         |
| 12988                                | 163       | 44.1        | 0.25       | 44.32           | 177       | 11518           | 0.04805       | 0.11  | 0.10381 | 0.14  | 0.015676     | 0.07       | 0.57        | 100.7         | 2.7     | 100.29 | 0.13    | 100.270      | 0.074   |                                                         |
| 12989                                | 164       | 40.5        | 0.26       | 40.80           | 156       | 10200           | 0.04793       | 0.11  | 0.10351 | 0.14  | 0.015672     | 0.04       | 0.83        | 94.5          | 2.8     | 100.01 | 0.14    | 100.243      | 0.035   |                                                         |
| 12990                                | 165       | 48.8        | 0.26       | 49.01           | 187       | 12201           | 0.04804       | 0.08  | 0.10375 | 0.11  | 0.015671     | 0.03       | 0.62        | 100.1         | 2.1     | 100.23 | 0.10    | 100.237      | 0.034   |                                                         |
| 13000                                | 166       | 43.7        | 0.25       | 43.97           | 176       | 11495           | 0.04799       | 0.07  | 0.10372 | 0.10  | 0.015682     | 0.03       | 0.69        | 97.7          | 1.9     | 100.20 | 0.09    | 100.306      | 0.030   |                                                         |
| 13011                                | 167       | 51.7        | 0.28       | 52.03           | 184       | 12030           | 0.04795       | 0.09  | 0.10358 | 0.12  | 0.015674     | 0.04       | 0.65        | 95.7          | 2.2     | 100.07 | 0.11    | 100.258      | 0.040   |                                                         |
| 13012                                | 168       | 48.5        | 0.28       | 48.73           | 175       | 11405           | 0.04797       | 0.12  | 0.10364 | 0.15  | 0.015678     | 0.04       | 0.77        | 96.6          | 3.0     | 100.13 | 0.15    | 100.279      | 0.040   |                                                         |
| 13013                                | 169       | 49.2        | 0.27       | 49.50           | 185       | 12066           | 0.04800       | 0.09  | 0.10362 | 0.11  | 0.015662     | 0.03       | 0.82        | 98.3          | 2.2     | 100.11 | 0.11    | 100.182      | 0.025   |                                                         |
| ET100_2535_b2_PHOENIX_Daly_nov2016   |           |             |            |                 |           |                 |               |       |         |       |              |            |             |               |         |        |         |              |         |                                                         |
| 3/2_25                               | 170       | 53.9        | 0.80       | 54.69           | 68        | 4424            | 0.04801       | 0.10  | 0.10371 | 0.12  | 0.015674     | 0.03       | 0.51        | 98.7          | 2.5     | 100.20 | 0.11    | 100.259      | 0.031   | 100.2523 ± 0.0084 Ma [X] error, 2σ<br>MSWD = 1.1, N = 9 |
| 3/2_26                               | 171       | 55.4        | 0.79       | 56.14           | 70        | 4592            | 0.04800       | 0.10  | 0.10371 | 0.11  | 0.015676     | 0.03       | 0.51        | 98.4          | 2.4     | 100.19 | 0.11    | 100.269      | 0.027   |                                                         |
| 3/2_27                               | 172       | 50.5        | 0.63       | 51.17           | 80        | 5236            | 0.04802       | 0.09  | 0.10374 | 0.10  | 0.015674     | 0.03       | 0.43        | 99.3          | 2.1     | 100.22 | 0.09    | 100.259      | 0.025   |                                                         |
| 3/2_28                               | 173       | 50.4        | 0.60       | 51.02           | 84        | 5497            | 0.04800       | 0.08  | 0.10368 | 0.10  | 0.015675     | 0.03       | 0.45        | 98.0          | 2.1     | 100.17 | 0.09    | 100.265      | 0.025   |                                                         |
| 3/2_29                               | 174       | 52.1        | 0.63       | 52.77           | 82        | 5383            | 0.04801       | 0.09  | 0.10368 | 0.10  | 0.015671     | 0.03       | 0.47        | 98.6          | 2.2     | 100.17 | 0.10    | 100.239      | 0.025   |                                                         |
| 3/2_30                               | 175       | 51.2        | 0.28       | 51.43           | 182       | 11902           | 0.04797       | 0.04  | 0.10360 | 0.06  | 0.015672     | 0.02       | 0.49        | 96.5          | 1.3     | 100.09 | 0.06    | 100.246      | 0.024   |                                                         |
| 3/2_31                               | 176       | 48.9        | 0.27       | 49.16           | 182       | 11880           | 0.04795       | 0.05  | 0.10357 | 0.07  | 0.015671     | 0.02       | 0.45        | 95.8          | 1.4     | 100.06 | 0.06    | 100.239      | 0.023   |                                                         |
| 3/2_33                               | 177       | 50.4        | 0.61       | 51.00           | 83        | 5434            | 0.04801       | 0.09  | 0.10370 | 0.10  | 0.015671     | 0.03       | 0.41        | 98.9          | 2.2     | 100.18 | 0.09    | 100.237      | 0.025   |                                                         |
| 3/2_34                               | 178       | 52.8        | 0.84       | 53.68           | 63        | 4140            | 0.04799       | 0.11  | 0.10367 | 0.12  | 0.015675     | 0.03       | 0.44        | 97.7          | 2.7     | 100.16 | 0.12    | 100.266      | 0.026   |                                                         |

|                                       |     |      |      |       |     |       |         |      |         |      |          |      |      |       |     |        |      |         |       |                                                                           |
|---------------------------------------|-----|------|------|-------|-----|-------|---------|------|---------|------|----------|------|------|-------|-----|--------|------|---------|-------|---------------------------------------------------------------------------|
| ET100_2535_b2_PHOENIX_FARall_nov2016  |     |      |      |       |     |       |         |      |         |      |          |      |      |       |     |        |      |         |       |                                                                           |
| 3/2_35                                | 179 | 21.7 | 0.29 | 21.98 | 75  | 4908  | 0.04831 | 0.16 | 0.10433 | 0.16 | 0.015670 | 0.03 | 0.28 | 113.3 | 3.7 | 100.76 | 0.16 | 100.234 | 0.029 | 100.2542 ± 0.0099 Ma [X] error, 2σ<br>MSWD = 1.2, N = 9                   |
| 3/2_36                                | 180 | 22.9 | 0.34 | 23.21 | 68  | 4441  | 0.04824 | 0.17 | 0.10422 | 0.18 | 0.015675 | 0.03 | 0.19 | 110.1 | 4.1 | 100.66 | 0.17 | 100.264 | 0.030 |                                                                           |
| 3/2_37                                | 181 | 25.2 | 0.43 | 25.60 | 59  | 3841  | 0.04805 | 0.15 | 0.10381 | 0.16 | 0.015677 | 0.03 | 0.39 | 100.6 | 3.5 | 100.29 | 0.15 | 100.276 | 0.033 |                                                                           |
| 3/2_38                                | 182 | 29.5 | 0.44 | 29.90 | 67  | 4360  | 0.04815 | 0.13 | 0.10402 | 0.14 | 0.015677 | 0.03 | 0.38 | 105.4 | 3.1 | 100.48 | 0.13 | 100.274 | 0.027 |                                                                           |
| 3/2_39                                | 183 | 24.5 | 0.63 | 25.11 | 39  | 2547  | 0.04814 | 0.18 | 0.10399 | 0.20 | 0.015674 | 0.03 | 0.53 | 105.0 | 4.4 | 100.45 | 0.19 | 100.259 | 0.030 |                                                                           |
| 3/2_40                                | 184 | 26.5 | 0.48 | 26.99 | 56  | 3636  | 0.04823 | 0.15 | 0.10418 | 0.16 | 0.015674 | 0.03 | 0.39 | 109.5 | 3.5 | 100.63 | 0.15 | 100.256 | 0.032 |                                                                           |
| 3/2_41                                | 185 | 22.9 | 0.31 | 23.20 | 75  | 4892  | 0.04812 | 0.14 | 0.10393 | 0.15 | 0.015671 | 0.03 | 0.32 | 104.3 | 3.5 | 100.40 | 0.15 | 100.236 | 0.031 |                                                                           |
| 3/2_42                                | 186 | 22.2 | 0.12 | 22.34 | 187 | 12184 | 0.04805 | 0.11 | 0.10378 | 0.12 | 0.015673 | 0.03 | 0.26 | 100.6 | 2.7 | 100.26 | 0.11 | 100.251 | 0.026 | Mean Nov2016<br>100.251 ± 0.0056 Ma [X] error, 2σ<br>MSWD = 2.6, N = 30   |
| 3/2_43                                | 187 | 18.0 | 0.52 | 18.55 | 35  | 2276  | 0.04823 | 0.22 | 0.10417 | 0.24 | 0.015670 | 0.03 | 0.54 | 109.6 | 5.3 | 100.62 | 0.23 | 100.235 | 0.031 |                                                                           |
| ET100_2535_b2_Triton_nov2017          |     |      |      |       |     |       |         |      |         |      |          |      |      |       |     |        |      |         |       |                                                                           |
| 13606                                 | 188 | 47.2 | 0.26 | 47.48 | 184 | 11978 | 0.04802 | 0.08 | 0.10371 | 0.10 | 0.015670 | 0.03 | 0.62 | 99.3  | 2.0 | 100.20 | 0.09 | 100.234 | 0.025 | 100.206 ± 0.0084 Ma [X] error, 2σ<br>MSWD = 5.3, N = 10                   |
| 13607                                 | 189 | 43.1 | 0.27 | 43.33 | 158 | 10340 | 0.04798 | 0.12 | 0.10362 | 0.15 | 0.015671 | 0.03 | 0.85 | 97.0  | 2.9 | 100.11 | 0.14 | 100.240 | 0.030 |                                                                           |
| 13608                                 | 190 | 39.2 | 0.24 | 39.46 | 163 | 10632 | 0.04802 | 0.09 | 0.10370 | 0.11 | 0.015669 | 0.02 | 0.84 | 99.1  | 2.2 | 100.18 | 0.11 | 100.227 | 0.024 |                                                                           |
| 13609                                 | 191 | 48.8 | 0.27 | 49.02 | 182 | 11858 | 0.04803 | 0.09 | 0.10372 | 0.12 | 0.015670 | 0.03 | 0.75 | 99.7  | 2.3 | 100.21 | 0.11 | 100.229 | 0.025 |                                                                           |
| 13610                                 | 192 | 51.1 | 0.26 | 51.34 | 198 | 12914 | 0.04810 | 0.07 | 0.10388 | 0.09 | 0.015669 | 0.03 | 0.57 | 103.3 | 1.7 | 100.35 | 0.08 | 100.226 | 0.027 |                                                                           |
| 13611                                 | 193 | 46.6 | 0.24 | 46.86 | 196 | 12773 | 0.04808 | 0.05 | 0.10381 | 0.08 | 0.015666 | 0.03 | 0.63 | 102.1 | 1.5 | 100.28 | 0.07 | 100.208 | 0.028 |                                                                           |
| 13612                                 | 194 | 50.6 | 0.26 | 50.87 | 198 | 12900 | 0.04803 | 0.06 | 0.10364 | 0.09 | 0.015657 | 0.03 | 0.63 | 99.7  | 1.7 | 100.13 | 0.08 | 100.148 | 0.026 |                                                                           |
| 13613                                 | 195 | 42.2 | 0.24 | 42.48 | 178 | 11639 | 0.04802 | 0.07 | 0.10364 | 0.08 | 0.015662 | 0.03 | 0.51 | 99.0  | 1.8 | 100.13 | 0.08 | 100.181 | 0.026 |                                                                           |
| 13614                                 | 196 | 47.1 | 0.27 | 47.36 | 175 | 11445 | 0.04796 | 0.08 | 0.10353 | 0.10 | 0.015662 | 0.02 | 0.67 | 96.3  | 2.0 | 100.03 | 0.09 | 100.183 | 0.024 |                                                                           |
| 13615                                 | 197 | 51.7 | 0.43 | 52.10 | 120 | 7832  | 0.04789 | 0.09 | 0.10336 | 0.12 | 0.015662 | 0.04 | 0.69 | 92.6  | 2.2 | 99.88  | 0.11 | 100.182 | 0.035 |                                                                           |
| ET100_2535_b2_Phoenix_nov2017         |     |      |      |       |     |       |         |      |         |      |          |      |      |       |     |        |      |         |       |                                                                           |
| ET100_3-2_90                          | 198 | 31.0 | 0.52 | 31.54 | 60  | 3930  | 0.04799 | 0.12 | 0.10363 | 0.14 | 0.015668 | 0.03 | 0.46 | 97.8  | 3.0 | 100.13 | 0.13 | 100.222 | 0.028 | 100.187 ± 0.009 Ma [X] error, 2σ<br>MSWD = 5.8, N = 9                     |
| ET100_3-2_91                          | 199 | 23.0 | 0.33 | 23.31 | 70  | 4557  | 0.04790 | 0.13 | 0.10332 | 0.14 | 0.015651 | 0.03 | 0.42 | 93.4  | 3.2 | 99.84  | 0.14 | 100.110 | 0.030 |                                                                           |
| ET100_3-2_93                          | 200 | 52.8 | 0.43 | 53.27 | 123 | 8055  | 0.04802 | 0.08 | 0.10364 | 0.10 | 0.015662 | 0.03 | 0.60 | 99.0  | 2.0 | 100.13 | 0.09 | 100.178 | 0.028 |                                                                           |
| ET100_3-2_94                          | 201 | 53.2 | 0.54 | 53.69 | 99  | 6464  | 0.04798 | 0.09 | 0.10362 | 0.11 | 0.015669 | 0.03 | 0.60 | 97.3  | 2.2 | 100.11 | 0.10 | 100.227 | 0.030 |                                                                           |
| ET100_3-2_95                          | 202 | 55.7 | 0.28 | 55.97 | 198 | 12898 | 0.04801 | 0.05 | 0.10365 | 0.06 | 0.015664 | 0.02 | 0.45 | 98.8  | 1.3 | 100.14 | 0.06 | 100.196 | 0.024 |                                                                           |
| ET100_3-2_96                          | 203 | 49.4 | 0.82 | 50.21 | 60  | 3930  | 0.04812 | 0.12 | 0.10389 | 0.14 | 0.015666 | 0.03 | 0.45 | 104.1 | 3.1 | 100.36 | 0.13 | 100.207 | 0.030 |                                                                           |
| ET100_3-2_97                          | 204 | 55.9 | 0.75 | 56.67 | 75  | 4885  | 0.04806 | 0.10 | 0.10371 | 0.11 | 0.015660 | 0.03 | 0.43 | 100.9 | 2.4 | 100.20 | 0.11 | 100.168 | 0.025 | Mean Nov207<br>100.197 ± 0.006 Ma [X] error, 2σ.<br>MSWD = 5.8, N = 19    |
| ET100_3-2_98                          | 205 | 39.2 | 0.22 | 39.42 | 180 | 11743 | 0.04803 | 0.06 | 0.10366 | 0.08 | 0.015662 | 0.03 | 0.51 | 99.5  | 1.6 | 100.15 | 0.07 | 100.178 | 0.025 |                                                                           |
| ET100_3-2_99                          | 206 | 46.2 | 0.26 | 46.49 | 180 | 11724 | 0.04800 | 0.07 | 0.10363 | 0.08 | 0.015665 | 0.03 | 0.47 | 98.2  | 1.8 | 100.12 | 0.08 | 100.200 | 0.026 |                                                                           |
| change amplifiers for Triton to 10e13 |     |      |      |       |     |       |         |      |         |      |          |      |      |       |     |        |      |         |       |                                                                           |
| ET100_2535_b2_Triton_Oct2018          |     |      |      |       |     |       |         |      |         |      |          |      |      |       |     |        |      |         |       |                                                                           |
| 14035                                 | 207 | 44.0 | 0.24 | 44.21 | 186 | 12151 | 0.04801 | 0.10 | 0.10362 | 0.12 | 0.015660 | 0.03 | 0.40 | 98.8  | 2.6 | 100.11 | 0.11 | 100.170 | 0.026 | 100.137 ± 0.0079 Ma [X] error, 2σ.<br>MSWD = 2.0, N = 14                  |
| 14036                                 | 208 | 50.1 | 0.28 | 50.36 | 178 | 11646 | 0.04803 | 0.08 | 0.10363 | 0.10 | 0.015656 | 0.03 | 0.62 | 99.6  | 2.1 | 100.12 | 0.10 | 100.142 | 0.030 |                                                                           |
| 14037                                 | 209 | 55.0 | 0.26 | 55.23 | 214 | 13932 | 0.04803 | 0.05 | 0.10366 | 0.07 | 0.015660 | 0.03 | 0.57 | 99.7  | 1.4 | 100.15 | 0.07 | 100.166 | 0.026 |                                                                           |
| 14038                                 | 210 | 46.9 | 0.23 | 47.11 | 202 | 13178 | 0.04803 | 0.07 | 0.10362 | 0.09 | 0.015654 | 0.03 | 0.67 | 99.8  | 1.9 | 100.12 | 0.09 | 100.131 | 0.028 |                                                                           |
| 14039                                 | 211 | 48.9 | 0.30 | 49.17 | 165 | 10526 | 0.04803 | 0.12 | 0.10360 | 0.17 | 0.015651 | 0.04 | 0.97 | 99.6  | 3.0 | 100.09 | 0.16 | 100.113 | 0.039 |                                                                           |
| 14040                                 | 212 | 44.3 | 0.26 | 44.56 | 169 | 10928 | 0.04800 | 0.10 | 0.10357 | 0.12 | 0.015658 | 0.03 | 0.59 | 97.9  | 2.4 | 100.07 | 0.11 | 100.159 | 0.027 |                                                                           |
| 14041                                 | 213 | 40.8 | 0.30 | 41.06 | 137 | 8733  | 0.04794 | 0.17 | 0.10341 | 0.21 | 0.015651 | 0.04 | 0.92 | 95.4  | 4.1 | 99.92  | 0.20 | 100.113 | 0.042 |                                                                           |
| 14042                                 | 214 | 44.9 | 0.28 | 45.18 | 159 | 10341 | 0.04801 | 0.14 | 0.10358 | 0.17 | 0.015653 | 0.03 | 0.74 | 98.8  | 3.4 | 100.07 | 0.16 | 100.125 | 0.033 |                                                                           |
| 14043                                 | 215 | 48.0 | 0.28 | 48.28 | 171 | 11036 | 0.04800 | 0.13 | 0.10356 | 0.16 | 0.015655 | 0.05 | 0.81 | 98.3  | 3.1 | 100.06 | 0.16 | 100.134 | 0.045 |                                                                           |
| 14049                                 | 216 | 28.8 | 0.17 | 29.01 | 175 | 11403 | 0.04802 | 0.07 | 0.10361 | 0.10 | 0.015656 | 0.03 | 0.76 | 99.2  | 1.8 | 100.10 | 0.09 | 100.141 | 0.028 |                                                                           |
| 14050                                 | 217 | 41.8 | 0.23 | 42.01 | 178 | 11636 | 0.04798 | 0.07 | 0.10349 | 0.09 | 0.015652 | 0.02 | 0.71 | 97.0  | 1.8 | 99.99  | 0.09 | 100.115 | 0.024 |                                                                           |
| 14051                                 | 218 | 36.6 | 0.20 | 36.80 | 182 | 11906 | 0.04797 | 0.06 | 0.10349 | 0.09 | 0.015655 | 0.03 | 0.70 | 96.5  | 1.7 | 99.99  | 0.08 | 100.134 | 0.027 |                                                                           |
| 14065                                 | 219 | 39.8 | 0.22 | 40.03 | 181 | 11841 | 0.04800 | 0.08 | 0.10353 | 0.10 | 0.015649 | 0.03 | 0.59 | 98.2  | 1.9 | 100.03 | 0.09 | 100.101 | 0.032 |                                                                           |
| 14066                                 | 220 | 44.2 | 0.23 | 44.40 | 191 | 12473 | 0.04802 | 0.08 | 0.10361 | 0.10 | 0.015654 | 0.03 | 0.58 | 99.4  | 2.1 | 100.10 | 0.10 | 100.133 | 0.030 |                                                                           |
| ET100_2535_b2_Phoenix_Oct2018         |     |      |      |       |     |       |         |      |         |      |          |      |      |       |     |        |      |         |       |                                                                           |
| ET100_161                             | 221 | 44.6 | 0.29 | 44.90 | 156 | 10132 | 0.04793 | 0.06 | 0.10336 | 0.08 | 0.015649 | 0.03 | 0.58 | 94.5  | 1.7 | 99.87  | 0.08 | 100.098 | 0.027 | 100.136 ± 0.009 Ma [X] error, 2σ.<br>MSWD = 3.1, N = 10                   |
| ET100_162                             | 222 | 45.2 | 0.25 | 45.47 | 184 | 11953 | 0.04803 | 0.06 | 0.10362 | 0.07 | 0.015653 | 0.02 | 0.27 | 99.7  | 1.5 | 100.11 | 0.06 | 100.125 | 0.024 |                                                                           |
| ET100_163                             | 223 | 42.9 | 0.27 | 43.18 | 160 | 10400 | 0.04804 | 0.07 | 0.10366 | 0.08 | 0.015656 | 0.03 | 0.28 | 100.3 | 1.7 | 100.15 | 0.07 | 100.144 | 0.025 |                                                                           |
| ET100_164                             | 224 | 45.5 | 0.32 | 45.85 | 143 | 9320  | 0.04805 | 0.06 | 0.10366 | 0.07 | 0.015653 | 0.02 | 0.51 | 100.8 | 1.5 | 100.15 | 0.07 | 100.126 | 0.024 |                                                                           |
| ET100_165                             | 225 | 44.5 | 0.37 | 44.86 | 120 | 7837  | 0.04809 | 0.06 | 0.10376 | 0.07 | 0.015656 | 0.02 | 0.30 | 102.5 | 1.7 | 100.24 | 0.07 | 100.140 | 0.024 |                                                                           |
| ET100_166                             | 226 | 57.1 | 0.42 | 57.53 | 135 | 8787  | 0.04804 | 0.07 | 0.10366 | 0.08 | 0.015657 | 0.03 | 0.20 | 100.0 | 1.8 | 100.14 | 0.07 | 100.152 | 0.026 |                                                                           |
| ET100_167                             | 227 | 39.3 | 0.39 | 39.72 | 100 | 6481  | 0.04801 | 0.10 | 0.10358 | 0.11 | 0.015654 | 0.03 | 0.49 | 98.7  | 2.4 | 100.07 | 0.11 | 100.133 | 0.028 |                                                                           |
| ET100_168                             | 228 | 41.9 | 0.45 | 42.34 | 94  | 6094  | 0.04801 | 0.12 | 0.10355 | 0.15 | 0.015649 | 0.04 | 0.72 | 98.9  | 2.9 | 100.05 | 0.14 | 100.100 | 0.039 | Mean Oct2018<br>100.1366 ± 0.0058 Ma [X] error, 2σ.<br>MSWD = 2.4, N = 24 |
| ET100_169                             | 229 | 45.3 | 0.45 | 45.73 | 101 | 6582  | 0.04803 | 0.08 | 0.10368 | 0.10 | 0.015663 | 0.03 | 0.38 | 99.7  | 2.1 | 100.17 | 0.09 | 100.186 | 0.029 |                                                                           |
| ET100_170                             | 230 | 46.6 | 0.60 | 47.20 | 77  | 5025  | 0.04    |      |         |      |          |      |      |       |     |        |      |         |       |                                                                           |

|                                                                                                                                             |     |      |      |       |     |       |         |      |         |      |          |      |      |       |     |        |      |         |       |                                                         |
|---------------------------------------------------------------------------------------------------------------------------------------------|-----|------|------|-------|-----|-------|---------|------|---------|------|----------|------|------|-------|-----|--------|------|---------|-------|---------------------------------------------------------|
| ET100_2535_b2_TRITON_may2020                                                                                                                |     |      |      |       |     |       |         |      |         |      |          |      |      |       |     |        |      |         |       |                                                         |
| 14458                                                                                                                                       | 231 | 47.6 | 0.37 | 48.01 | 130 | 8510  | 0.04809 | 0.09 | 0.10379 | 0.11 | 0.015661 | 0.03 | 0.69 | 102.7 | 2.2 | 100.27 | 0.10 | 100.172 | 0.029 | 100.164 ± 0.011 Ma [X] error, 2σ<br>MSWD = 0.52, N = 9  |
| 14459                                                                                                                                       | 232 | 45.1 | 0.33 | 45.42 | 136 | 8853  | 0.04811 | 0.08 | 0.10383 | 0.10 | 0.015659 | 0.03 | 0.70 | 103.6 | 2.0 | 100.30 | 0.10 | 100.161 | 0.028 |                                                         |
| 14460                                                                                                                                       | 233 | 38.0 | 0.24 | 38.22 | 155 | 10131 | 0.04805 | 0.07 | 0.10368 | 0.09 | 0.015657 | 0.03 | 0.53 | 100.7 | 1.9 | 100.17 | 0.09 | 100.149 | 0.027 |                                                         |
| 14462                                                                                                                                       | 234 | 44.0 | 0.56 | 44.55 | 78  | 5125  | 0.04810 | 0.11 | 0.10380 | 0.13 | 0.015658 | 0.03 | 0.58 | 103.2 | 2.7 | 100.28 | 0.12 | 100.156 | 0.030 |                                                         |
| 14463                                                                                                                                       | 235 | 50.7 | 0.89 | 51.62 | 57  | 3736  | 0.04817 | 0.15 | 0.10396 | 0.17 | 0.015660 | 0.04 | 0.59 | 106.4 | 3.6 | 100.42 | 0.16 | 100.171 | 0.039 |                                                         |
| 14464                                                                                                                                       | 236 | 43.9 | 0.61 | 44.50 | 72  | 4730  | 0.04814 | 0.11 | 0.10390 | 0.13 | 0.015661 | 0.03 | 0.60 | 104.9 | 2.7 | 100.37 | 0.12 | 100.177 | 0.028 |                                                         |
| 14465                                                                                                                                       | 237 | 38.8 | 0.30 | 39.10 | 129 | 8431  | 0.04815 | 0.11 | 0.10393 | 0.13 | 0.015662 | 0.04 | 0.56 | 105.7 | 2.7 | 100.40 | 0.13 | 100.180 | 0.037 |                                                         |
| 14466                                                                                                                                       | 238 | 48.5 | 0.43 | 48.97 | 112 | 7319  | 0.04808 | 0.10 | 0.10374 | 0.12 | 0.015658 | 0.03 | 0.66 | 101.9 | 2.4 | 100.23 | 0.11 | 100.153 | 0.033 |                                                         |
| 14467                                                                                                                                       | 239 | 55.0 | 0.54 | 55.54 | 102 | 6645  | 0.04806 | 0.16 | 0.10373 | 0.19 | 0.015661 | 0.05 | 0.69 | 101.1 | 3.8 | 100.21 | 0.18 | 100.172 | 0.049 |                                                         |
| ET100_2535_b2_PHOENIX_may2020                                                                                                               |     |      |      |       |     |       |         |      |         |      |          |      |      |       |     |        |      |         |       |                                                         |
| ET100_191                                                                                                                                   | 240 | 40.1 | 0.27 | 40.36 | 150 | 9807  | 0.04792 | 0.08 | 0.10338 | 0.11 | 0.015654 | 0.03 | 0.64 | 94.2  | 2.1 | 99.89  | 0.10 | 100.131 | 0.031 | 100.1666 ± 0.0086 Ma [X] error, 2σ<br>MSWD = 2.2 N = 10 |
| ET100_192                                                                                                                                   | 241 | 43.0 | 0.28 | 43.27 | 153 | 10000 | 0.04798 | 0.06 | 0.10356 | 0.08 | 0.015663 | 0.03 | 0.49 | 97.0  | 1.6 | 100.06 | 0.07 | 100.190 | 0.027 |                                                         |
| ET100_193                                                                                                                                   | 242 | 40.4 | 0.26 | 40.69 | 158 | 10288 | 0.04797 | 0.07 | 0.10352 | 0.08 | 0.015659 | 0.03 | 0.35 | 96.7  | 1.8 | 100.02 | 0.08 | 100.159 | 0.025 |                                                         |
| ET100_194                                                                                                                                   | 243 | 44.1 | 0.32 | 44.42 | 140 | 9112  | 0.04797 | 0.06 | 0.10354 | 0.08 | 0.015660 | 0.03 | 0.54 | 96.9  | 1.7 | 100.04 | 0.08 | 100.167 | 0.025 |                                                         |
| ET100_195                                                                                                                                   | 244 | 45.6 | 0.28 | 45.90 | 161 | 10504 | 0.04806 | 0.05 | 0.10375 | 0.07 | 0.015663 | 0.03 | 0.49 | 101.3 | 1.4 | 100.23 | 0.07 | 100.187 | 0.025 |                                                         |
| ET100_196                                                                                                                                   | 245 | 43.4 | 0.25 | 43.64 | 177 | 11554 | 0.04795 | 0.08 | 0.10348 | 0.10 | 0.015658 | 0.03 | 0.42 | 95.9  | 2.1 | 99.98  | 0.09 | 100.156 | 0.033 |                                                         |
| ET100_197                                                                                                                                   | 246 | 41.3 | 0.25 | 41.59 | 166 | 10856 | 0.04801 | 0.07 | 0.10364 | 0.09 | 0.015665 | 0.03 | 0.47 | 98.5  | 1.9 | 100.13 | 0.09 | 100.201 | 0.031 |                                                         |
| ET100_198                                                                                                                                   | 247 | 46.1 | 0.31 | 46.44 | 147 | 9589  | 0.04792 | 0.09 | 0.10343 | 0.10 | 0.015660 | 0.03 | 0.47 | 94.4  | 2.1 | 99.94  | 0.10 | 100.169 | 0.031 |                                                         |
| ET100_199                                                                                                                                   | 248 | 46.7 | 0.28 | 46.96 | 165 | 10782 | 0.04805 | 0.06 | 0.10368 | 0.07 | 0.015657 | 0.02 | 0.18 | 100.7 | 1.7 | 100.17 | 0.07 | 100.146 | 0.023 |                                                         |
| ET100_200                                                                                                                                   | 249 | 43.5 | 0.46 | 43.97 | 94  | 6145  | 0.04800 | 0.08 | 0.10358 | 0.10 | 0.015659 | 0.03 | 0.47 | 98.0  | 2.1 | 100.08 | 0.10 | 100.163 | 0.026 |                                                         |
| b1 - ET2535 bottle 1                                                                                                                        |     |      |      |       |     |       |         |      |         |      |          |      |      |       |     |        |      |         |       |                                                         |
| b2 - ET2535 bottle 2                                                                                                                        |     |      |      |       |     |       |         |      |         |      |          |      |      |       |     |        |      |         |       |                                                         |
| a Total mass of radiogenic Pb.                                                                                                              |     |      |      |       |     |       |         |      |         |      |          |      |      |       |     |        |      |         |       |                                                         |
| b Total mass of common Pb.                                                                                                                  |     |      |      |       |     |       |         |      |         |      |          |      |      |       |     |        |      |         |       |                                                         |
| c Ratio of radiogenic Pb (including 208Pb) to common Pb.                                                                                    |     |      |      |       |     |       |         |      |         |      |          |      |      |       |     |        |      |         |       |                                                         |
| d Measured ratio corrected for fractionation and spike contribution only.                                                                   |     |      |      |       |     |       |         |      |         |      |          |      |      |       |     |        |      |         |       |                                                         |
| e Measured ratios corrected for fractionation, tracer and blank.                                                                            |     |      |      |       |     |       |         |      |         |      |          |      |      |       |     |        |      |         |       |                                                         |
| f Isotopic dates calculated using $\lambda_{238} = 1.55125E-10$ (Jaffey et al. 1971) and $\lambda_{235} = 9.8485E-10$ (Jaffey et al. 1971). |     |      |      |       |     |       |         |      |         |      |          |      |      |       |     |        |      |         |       |                                                         |

Table S5: U-Pb isotope results of ET100 solution using improved spike sample equilibration from University of Geneva, Princeton University and ETH Zürich labs

|                                |             | Composition |            |                   | Isotopic Ratios |               |               |         |              |       |              | Dates (Ma) |             |               |         |              |         |              |         |                                                                                                 |
|--------------------------------|-------------|-------------|------------|-------------------|-----------------|---------------|---------------|---------|--------------|-------|--------------|------------|-------------|---------------|---------|--------------|---------|--------------|---------|-------------------------------------------------------------------------------------------------|
| Fraction                       | Running #   | Pb* (pg) a  | Pbc (pg) b | total mass Pb(pg) | Pb*/Pbc c       | 206Pb/204Pb d | 207Pb/206Pb e | ±2σ %   | 207Pb/235U e | ±2σ % | 206Pb/238U e | ±2σ %      | Corr. coef. | 207Pb/206Pb f | ±2σ abs | 207Pb/235U f | ±2σ abs | 206Pb/238U f | ±2σ abs | Mean age calculations                                                                           |
| <b>University of Geneva</b>    |             |             |            |                   |                 |               |               |         |              |       |              |            |             |               |         |              |         |              |         |                                                                                                 |
| December 28, 2020 μCap Flux    |             |             |            |                   |                 |               |               |         |              |       |              |            |             |               |         |              |         |              |         |                                                                                                 |
|                                | 251         | 49.7        | 0.29       | 49.96             | 170             | 11074         | 0.04798       | 0.06    | 0.10353      | 0.07  | 0.015656     | 0.03       | 0.29        | 97.3          | 1.7     | 100.03       | 0.07    | 100.142      | 0.028   | 100.1699 ± 0.0097 Ma [X] error, 2σ<br>MSWD = 2.1, N = 8                                         |
|                                | 252         | 49.7        | 0.27       | 49.97             | 182             | 11865         | 0.04798       | 0.06    | 0.10356      | 0.07  | 0.015660     | 0.03       | 0.20        | 97.4          | 1.6     | 100.06       | 0.06    | 100.171      | 0.027   |                                                                                                 |
|                                | 253         | 49.7        | 0.29       | 49.98             | 169             | 11552         | 0.04798       | 0.06    | 0.10358      | 0.08  | 0.015663     | 0.03       | 0.30        | 97.3          | 1.7     | 100.07       | 0.07    | 100.187      | 0.026   |                                                                                                 |
|                                | 254         | 49.7        | 0.29       | 49.97             | 173             | 11266         | 0.04801       | 0.05    | 0.10362      | 0.06  | 0.015661     | 0.02       | 0.41        | 98.7          | 1.4     | 100.11       | 0.06    | 100.172      | 0.024   |                                                                                                 |
|                                | 255         | 49.7        | 0.57       | 50.25             | 88              | 5746          | 0.04805       | 0.11    | 0.10371      | 0.12  | 0.015660     | 0.04       | 0.47        | 100.8         | 2.6     | 100.19       | 0.12    | 100.167      | 0.038   |                                                                                                 |
|                                | 256         | 49.7        | 0.24       | 49.93             | 205             | 13236         | 0.04800       | 0.04    | 0.10357      | 0.06  | 0.015656     | 0.03       | 0.44        | 98.2          | 1.3     | 100.06       | 0.06    | 100.145      | 0.027   |                                                                                                 |
|                                | 257         | 49.7        | 0.25       | 49.95             | 196             | 12766         | 0.04798       | 0.05    | 0.10354      | 0.06  | 0.015660     | 0.03       | 0.50        | 97.0          | 1.3     | 100.04       | 0.06    | 100.167      | 0.027   |                                                                                                 |
|                                | 258         | 49.7        | 0.29       | 49.99             | 169             | 11494         | 0.04800       | 0.07    | 0.10362      | 0.08  | 0.015665     | 0.03       | 0.42        | 98.0          | 1.8     | 100.11       | 0.08    | 100.199      | 0.026   |                                                                                                 |
| January 8, 2021 μCap Flux      |             |             |            |                   |                 |               |               |         |              |       |              |            |             |               |         |              |         |              |         |                                                                                                 |
|                                | 259         | 45.9        | 0.32       | 46.23             | 143             | 9344          | 0.04793       | 0.07    | 0.10344      | 0.08  | 0.015658     | 0.03       | 0.40        | 94.9          | 1.8     | 99.95        | 0.08    | 100.156      | 0.027   | 100.1779 ± 0.0094 Ma [X] error, 2σ<br>MSWD = 2.2, N = 7                                         |
|                                | 260         | 45.9        | 0.28       | 46.20             | 167             | 10879         | 0.04799       | 0.05    | 0.10362      | 0.06  | 0.015666     | 0.02       | 0.36        | 97.9          | 1.4     | 100.12       | 0.06    | 100.206      | 0.024   |                                                                                                 |
|                                | 261         | 45.9        | 0.34       | 46.28             | 135             | 8799          | 0.04803       | 0.07    | 0.10366      | 0.08  | 0.015661     | 0.03       | 0.48        | 99.6          | 1.8     | 100.15       | 0.08    | 100.172      | 0.026   | <b>Total of 15 analyses (UNIGE)</b><br>100.1740 ± 0.0067 Ma [X] error, 2σ<br>MSWD = 2.1, N = 15 |
|                                | 262         | 45.9        | 0.30       | 46.23             | 151             | 10299         | 0.04797       | 0.07    | 0.10356      | 0.09  | 0.015665     | 0.03       | 0.37        | 96.8          | 1.9     | 100.06       | 0.08    | 100.200      | 0.026   |                                                                                                 |
|                                | 263         | 45.9        | 0.29       | 46.22             | 156             | 10178         | 0.04802       | 0.05    | 0.10364      | 0.07  | 0.015661     | 0.02       | 0.33        | 99.1          | 1.5     | 100.13       | 0.06    | 100.174      | 0.023   |                                                                                                 |
|                                | 264         | 45.9        | 0.29       | 46.22             | 158             | 10307         | 0.04800       | 0.06    | 0.10361      | 0.07  | 0.015660     | 0.02       | 0.27        | 98.4          | 1.5     | 100.10       | 0.06    | 100.170      | 0.025   |                                                                                                 |
|                                | 265         | 45.9        | 0.28       | 46.21             | 164             | 10721         | 0.04800       | 0.05    | 0.10358      | 0.07  | 0.015659     | 0.02       | 0.50        | 98.0          | 1.4     | 100.08       | 0.06    | 100.164      | 0.024   |                                                                                                 |
|                                | 265         | 45.9        | 0.28       | 46.21             | 164             | 10721         | 0.04800       | 0.05    | 0.10358      | 0.07  | 0.015659     | 0.02       | 0.50        | 98.0          | 1.4     | 100.08       | 0.06    | 100.164      | 0.024   |                                                                                                 |
| <b>Princeton University</b>    |             |             |            |                   |                 |               |               |         |              |       |              |            |             |               |         |              |         |              |         |                                                                                                 |
| ET100 Pb Daly, U Far, Jan 2018 |             |             |            |                   |                 |               |               |         |              |       |              |            |             |               |         |              |         |              |         |                                                                                                 |
|                                | 010218_ME1  | 17.8        | 0.39       | 18.19             | 46              | 3216          | 0.04786       | 0.43190 | 0.10325      | 0.47  | 0.015652     | 0.12       | 0.46        | 91.4          | 10.3    | 99.77        | 0.45    | 100.120      | 0.115   | 100.1680 ± 0.0054 Ma [X] error, 2σ<br>MSWD = 0.78, N = 18                                       |
|                                | 010218_ME2  | 17.8        | 0.38       | 18.20             | 47              | 3280          | 0.04801       | 0.30542 | 0.10359      | 0.31  | 0.015655     | 0.04       | 0.14        | 98.9          | 7.3     | 100.09       | 0.30    | 100.139      | 0.044   |                                                                                                 |
|                                | 010218_ME3  | 17.8        | 0.38       | 18.21             | 47              | 3286          | 0.04798       | 0.30660 | 0.10353      | 0.32  | 0.015656     | 0.05       | 0.32        | 97.3          | 7.3     | 100.03       | 0.31    | 100.141      | 0.048   |                                                                                                 |
|                                | 010218_ME4  | 17.8        | 0.39       | 18.18             | 46              | 3189          | 0.04798       | 0.31402 | 0.10359      | 0.32  | 0.015664     | 0.04       | 0.23        | 97.5          | 7.5     | 100.09       | 0.31    | 100.197      | 0.040   |                                                                                                 |
|                                | 010218_ME5  | 17.8        | 0.38       | 18.21             | 47              | 3244          | 0.04799       | 0.30546 | 0.10357      | 0.31  | 0.015659     | 0.04       | 0.23        | 97.7          | 7.3     | 100.06       | 0.30    | 100.162      | 0.038   |                                                                                                 |
|                                | 010218_ME6  | 17.8        | 0.41       | 18.24             | 44              | 3041          | 0.04807       | 0.32910 | 0.10375      | 0.34  | 0.015661     | 0.04       | 0.19        | 101.5         | 7.8     | 100.23       | 0.32    | 100.172      | 0.039   |                                                                                                 |
|                                | 010218_ME7  | 17.8        | 0.40       | 18.23             | 45              | 3133          | 0.04799       | 0.31668 | 0.10359      | 0.32  | 0.015663     | 0.04       | 0.22        | 97.7          | 7.5     | 100.09       | 0.31    | 100.187      | 0.038   |                                                                                                 |
|                                | 010218_ME8  | 17.8        | 0.40       | 18.23             | 45              | 3115          | 0.04794       | 0.32193 | 0.10348      | 0.34  | 0.015663     | 0.05       | 0.34        | 95.1          | 7.7     | 99.98        | 0.32    | 100.185      | 0.045   |                                                                                                 |
|                                | 010218_ME9  | 17.8        | 0.46       | 18.29             | 39              | 2714          | 0.04806       | 0.36501 | 0.10372      | 0.38  | 0.015658     | 0.05       | 0.31        | 101.4         | 8.7     | 100.20       | 0.36    | 100.154      | 0.045   |                                                                                                 |
|                                | 010218_ME10 | 17.8        | 0.44       | 18.27             | 40              | 2825          | 0.04799       | 0.35061 | 0.10354      | 0.36  | 0.015655     | 0.04       | 0.21        | 97.7          | 8.3     | 100.04       | 0.34    | 100.140      | 0.041   |                                                                                                 |
|                                | 010218_ME11 | 17.8        | 0.41       | 18.25             | 43              | 3027          | 0.04807       | 0.30810 | 0.10374      | 0.34  | 0.015659     | 0.05       | 0.62        | 101.6         | 7.3     | 100.22       | 0.32    | 100.162      | 0.047   |                                                                                                 |
|                                | 010218_ME12 | 17.8        | 0.45       | 18.28             | 40              | 2761          | 0.04804       | 0.37423 | 0.10369      | 0.39  | 0.015661     | 0.06       | 0.36        | 100.1         | 8.9     | 100.17       | 0.37    | 100.176      | 0.058   |                                                                                                 |
|                                | 010218_ME13 | 17.8        | 0.41       | 18.24             | 43              | 3010          | 0.04803       | 0.32990 | 0.10366      | 0.33  | 0.015660     | 0.04       | 0.08        | 99.6          | 7.8     | 100.15       | 0.32    | 100.171      | 0.039   |                                                                                                 |
|                                | 010218_ME14 | 17.8        | 0.43       | 18.26             | 42              | 2921          | 0.04789       | 0.37408 | 0.10338      | 0.40  | 0.015662     | 0.06       | 0.45        | 93.0          | 8.9     | 99.89        | 0.38    | 100.183      | 0.057   |                                                                                                 |
|                                | 010218_ME15 | 17.8        | 0.42       | 18.26             | 43              | 2970          | 0.04803       | 0.33778 | 0.10370      | 0.34  | 0.015665     | 0.04       | 0.08        | 99.9          | 8.0     | 100.19       | 0.32    | 100.199      | 0.044   |                                                                                                 |
|                                | 010218_ME16 | 17.8        | 0.45       | 18.27             | 40              | 2779          | 0.04805       | 0.44791 | 0.10369      | 0.46  | 0.015657     | 0.10       | 0.20        | 100.8         | 10.6    | 100.18       | 0.44    | 100.148      | 0.097   |                                                                                                 |
|                                | 010218_ME17 | 17.8        | 0.39       | 18.21             | 46              | 3213          | 0.04806       | 0.31566 | 0.10371      | 0.33  | 0.015658     | 0.04       | 0.36        | 101.1         | 7.5     | 100.19       | 0.32    | 100.158      | 0.043   |                                                                                                 |
|                                | 010218_ME18 | 17.8        | 0.50       | 18.33             | 36              | 2499          | 0.04801       | 0.41100 | 0.10362      | 0.43  | 0.015661     | 0.06       | 0.35        | 98.6          | 9.8     | 100.12       | 0.41    | 100.178      | 0.055   |                                                                                                 |
| ET100 Pb Daly, U Far, Apr 2018 |             |             |            |                   |                 |               |               |         |              |       |              |            |             |               |         |              |         |              |         |                                                                                                 |
|                                | 041118_ME1  | 70.7        | 0.34       | 71.02             | 205             | 14221         | 0.04807       | 0.09034 | 0.10368      | 0.12  | 0.015650     | 0.05       | 0.63        | 101.7         | 2.3     | 100.17       | 0.11    | 100.107      | 0.045   | 100.1406 ± 0.0054 Ma [X] error, 2σ<br>MSWD = 2.2, N = 10                                        |
|                                | 041118_ME2  | 70.7        | 0.34       | 71.04             | 208             | 14415         | 0.04802       | 0.09537 | 0.10360      | 0.11  | 0.015654     | 0.03       | 0.43        | 99.2          | 2.4     | 100.09       | 0.10    | 100.132      | 0.026   |                                                                                                 |
|                                | 041118_ME3  | 70.7        | 0.36       | 71.07             | 196             | 13589         | 0.04804       | 0.10712 | 0.10362      | 0.12  | 0.015652     | 0.04       | 0.30        | 100.0         | 2.6     | 100.12       | 0.11    | 100.121      | 0.036   |                                                                                                 |
|                                | 041118_ME4  | 70.7        | 0.38       | 71.09             | 188             | 13079         | 0.04804       | 0.08890 | 0.10364      | 0.11  | 0.015655     | 0.05       | 0.47        | 100.0         | 2.2     | 100.13       | 0.10    | 100.135      | 0.047   |                                                                                                 |
|                                | 041118_ME5  | 70.7        | 0.33       | 71.04             | 216             | 14983         | 0.04804       | 0.08653 | 0.10364      | 0.09  | 0.015653     | 0.02       | 0.07        | 100.2         | 2.2     | 100.13       | 0.09    | 100.127      | 0.022   |                                                                                                 |
|                                | 041118_ME6  | 36.3        | 0.19       | 36.47             | 195             | 13565         | 0.04801       | 0.08924 | 0.10361      | 0.10  | 0.015657     | 0.03       | 0.32        | 98.9          | 2.2     | 100.10       | 0.10    | 100.152      | 0.031   |                                                                                                 |
|                                | 041118_ME7  | 29.6        | 0.19       | 29.83             | 153             | 10600         | 0.04805       | 0.11517 | 0.10371      | 0.13  | 0.015662     | 0.04       | 0.38        | 100.6         | 2.8     | 100.20       | 0.12    | 100.178      | 0.036   |                                                                                                 |
|                                | 041118_ME8  | 29.6        | 0.19       | 29.82             | 159             | 11054         | 0.04806       | 0.10627 | 0.10372      | 0.11  | 0.015659     | 0.03       | 0.25        | 101.1         | 2.6     | 100.20       | 0.11    | 100.165      | 0.032   |                                                                                                 |
|                                | 041118_ME9  | 29.6        | 0.20       | 29.83             | 152             | 10532         | 0.04806       | 0.12490 | 0.10379      | 0.15  | 0.015669     | 0.09       | 0.52        | 101.4         | 3.1     | 100.27       | 0.14    | 100.223      | 0.087   |                                                                                                 |
|                                | 041118_ME10 | 29.6        | 0.19       | 29.83             | 152             | 10563         | 0.04805       | 0.10397 | 0.10370      | 0.12  | 0.015660     | 0.05       | 0.38        | 100.4         | 2.6     | 100.18       | 0.11    | 100.171      | 0.048   |                                                                                                 |

| ETH Zürich                                                                                                                                  |      |      |       |     |       |          |      |         |      |          |       |      |       |      |        |      |         |       |                                                                                                   |
|---------------------------------------------------------------------------------------------------------------------------------------------|------|------|-------|-----|-------|----------|------|---------|------|----------|-------|------|-------|------|--------|------|---------|-------|---------------------------------------------------------------------------------------------------|
| ET100 SEM 208                                                                                                                               |      |      |       |     |       |          |      |         |      |          |       |      |       |      |        |      |         |       |                                                                                                   |
| 18604                                                                                                                                       | 65.1 | 0.24 | 65.34 | 274 | 16943 | 0.048086 | 0.25 | 0.10380 | 0.26 | 0.015664 | 0.032 | 0.34 | 102.4 | 6.0  | 100.28 | 0.25 | 100.191 | 0.031 | 100.1837 ± 0.0115 Ma [X] error, 2σ<br>MSWD = 2.5, N = 10                                          |
| 18605                                                                                                                                       | 67.9 | 0.22 | 68.11 | 305 | 18872 | 0.048007 | 0.23 | 0.10357 | 0.24 | 0.015653 | 0.029 | 0.39 | 98.6  | 5.4  | 100.06 | 0.23 | 100.125 | 0.029 |                                                                                                   |
| 18621                                                                                                                                       | 66.8 | 0.20 | 67.05 | 330 | 20391 | 0.048069 | 0.21 | 0.10373 | 0.22 | 0.015658 | 0.028 | 0.38 | 101.6 | 5.0  | 100.21 | 0.21 | 100.154 | 0.028 |                                                                                                   |
| 18622                                                                                                                                       | 34.3 | 0.18 | 34.49 | 192 | 11910 | 0.048101 | 0.35 | 0.10379 | 0.36 | 0.015657 | 0.030 | 0.41 | 103.2 | 8.4  | 100.27 | 0.35 | 100.152 | 0.030 |                                                                                                   |
| 18656                                                                                                                                       | 68.9 | 0.58 | 69.52 | 119 | 7350  | 0.048197 | 0.57 | 0.10404 | 0.59 | 0.015663 | 0.041 | 0.47 | 107.9 | 13.5 | 100.50 | 0.56 | 100.185 | 0.041 |                                                                                                   |
| 18666                                                                                                                                       | 66.7 | 0.21 | 66.95 | 311 | 19233 | 0.048020 | 0.23 | 0.10368 | 0.24 | 0.015666 | 0.033 | 0.44 | 99.2  | 5.5  | 100.17 | 0.23 | 100.208 | 0.033 |                                                                                                   |
| 18719                                                                                                                                       | 56.3 | 0.19 | 56.53 | 292 | 18081 | 0.048014 | 0.24 | 0.10367 | 0.26 | 0.015666 | 0.034 | 0.40 | 98.9  | 5.8  | 100.15 | 0.25 | 100.206 | 0.034 |                                                                                                   |
| 18720                                                                                                                                       | 58.5 | 0.19 | 58.73 | 306 | 18954 | 0.048088 | 0.22 | 0.10381 | 0.24 | 0.015664 | 0.030 | 0.39 | 102.6 | 5.4  | 100.29 | 0.23 | 100.193 | 0.030 |                                                                                                   |
| 18728                                                                                                                                       | 55.1 | 0.23 | 55.36 | 239 | 14782 | 0.048024 | 0.29 | 0.10364 | 0.30 | 0.015658 | 0.034 | 0.30 | 99.4  | 6.9  | 100.13 | 0.29 | 100.158 | 0.034 |                                                                                                   |
| 18779                                                                                                                                       | 21.5 | 0.16 | 21.66 | 135 | 8380  | 0.047957 | 0.51 | 0.10351 | 0.53 | 0.015661 | 0.036 | 0.48 | 96.1  | 12.1 | 100.01 | 0.50 | 100.174 | 0.036 |                                                                                                   |
| 18905                                                                                                                                       | 43.6 | 0.13 | 43.78 | 333 | 20623 | 0.048065 | 0.21 | 0.10379 | 0.22 | 0.015668 | 0.030 | 0.38 | 101.4 | 5.0  | 100.27 | 0.21 | 100.218 | 0.030 |                                                                                                   |
| ET100 FARADAY 2018                                                                                                                          |      |      |       |     |       |          |      |         |      |          |       |      |       |      |        |      |         |       |                                                                                                   |
| 19690                                                                                                                                       | 57.7 | 0.18 | 57.86 | 321 | 19851 | 0.048030 | 0.21 | 0.10366 | 0.22 | 0.015661 | 0.019 | 0.42 | 99.7  | 5.1  | 100.15 | 0.21 | 100.173 | 0.019 | 100.1782 ± 0.0049 Ma [X] error, 2σ<br>MSWD = 2.5, N = 13                                          |
| 19692                                                                                                                                       | 53.5 | 0.16 | 53.68 | 340 | 21002 | 0.048097 | 0.20 | 0.10383 | 0.21 | 0.015664 | 0.015 | 0.42 | 103.0 | 4.8  | 100.30 | 0.20 | 100.191 | 0.015 |                                                                                                   |
| 19695                                                                                                                                       | 65.7 | 0.21 | 65.88 | 319 | 19754 | 0.048059 | 0.21 | 0.10373 | 0.22 | 0.015661 | 0.016 | 0.42 | 101.1 | 5.1  | 100.21 | 0.21 | 100.176 | 0.016 |                                                                                                   |
| 19738                                                                                                                                       | 61.4 | 0.17 | 61.58 | 355 | 21953 | 0.048091 | 0.19 | 0.10382 | 0.20 | 0.015664 | 0.015 | 0.42 | 102.7 | 4.5  | 100.30 | 0.19 | 100.193 | 0.014 |                                                                                                   |
| 19891                                                                                                                                       | 39.4 | 0.15 | 39.55 | 255 | 15771 | 0.048011 | 0.27 | 0.10364 | 0.28 | 0.015664 | 0.018 | 0.45 | 98.8  | 6.3  | 100.13 | 0.26 | 100.191 | 0.018 |                                                                                                   |
| 19959                                                                                                                                       | 56.2 | 0.16 | 56.37 | 352 | 21790 | 0.048085 | 0.19 | 0.10378 | 0.20 | 0.015660 | 0.016 | 0.40 | 102.4 | 4.6  | 100.26 | 0.19 | 100.168 | 0.016 |                                                                                                   |
| 19960                                                                                                                                       | 54.6 | 0.16 | 54.78 | 336 | 20814 | 0.048070 | 0.20 | 0.10376 | 0.21 | 0.015663 | 0.018 | 0.39 | 101.7 | 4.8  | 100.24 | 0.20 | 100.185 | 0.018 |                                                                                                   |
| 19961                                                                                                                                       | 52.9 | 0.15 | 53.01 | 360 | 22268 | 0.048080 | 0.19 | 0.10376 | 0.20 | 0.015659 | 0.016 | 0.39 | 102.1 | 4.5  | 100.24 | 0.19 | 100.160 | 0.015 |                                                                                                   |
| 19962                                                                                                                                       | 53.8 | 0.15 | 53.94 | 348 | 21514 | 0.048099 | 0.19 | 0.10380 | 0.20 | 0.015659 | 0.015 | 0.42 | 103.1 | 4.6  | 100.28 | 0.19 | 100.162 | 0.015 |                                                                                                   |
| 19968                                                                                                                                       | 43.8 | 0.15 | 43.92 | 302 | 18666 | 0.048109 | 0.22 | 0.10384 | 0.23 | 0.015662 | 0.016 | 0.41 | 103.6 | 5.4  | 100.32 | 0.22 | 100.180 | 0.016 |                                                                                                   |
| 20012                                                                                                                                       | 51.2 | 0.15 | 51.35 | 344 | 21281 | 0.048094 | 0.20 | 0.10381 | 0.21 | 0.015662 | 0.016 | 0.41 | 102.9 | 4.7  | 100.29 | 0.20 | 100.178 | 0.016 |                                                                                                   |
| 20027                                                                                                                                       | 55.9 | 0.15 | 56.02 | 365 | 22574 | 0.048083 | 0.18 | 0.10379 | 0.19 | 0.015662 | 0.015 | 0.40 | 102.3 | 4.4  | 100.27 | 0.18 | 100.183 | 0.015 |                                                                                                   |
| 20051                                                                                                                                       | 58.0 | 0.17 | 58.17 | 342 | 21176 | 0.048074 | 0.20 | 0.10374 | 0.21 | 0.015658 | 0.019 | 0.37 | 101.8 | 4.8  | 100.22 | 0.20 | 100.157 | 0.019 |                                                                                                   |
| <b>Total of 28 analyses (ETH)</b>                                                                                                           |      |      |       |     |       |          |      |         |      |          |       |      |       |      |        |      |         |       | 100.1791 ± 0.0043 Ma [X] error, 2σ<br>MSWD = 2.4, N = 23                                          |
| a Total mass of radiogenic Pb.                                                                                                              |      |      |       |     |       |          |      |         |      |          |       |      |       |      |        |      |         |       |                                                                                                   |
| b Total mass of common Pb.                                                                                                                  |      |      |       |     |       |          |      |         |      |          |       |      |       |      |        |      |         |       |                                                                                                   |
| c Ratio of radiogenic Pb (including 208Pb) to common Pb.                                                                                    |      |      |       |     |       |          |      |         |      |          |       |      |       |      |        |      |         |       |                                                                                                   |
| d Measured ratio corrected for fractionation and spike contribution only.                                                                   |      |      |       |     |       |          |      |         |      |          |       |      |       |      |        |      |         |       |                                                                                                   |
| e Measured ratios corrected for fractionation, tracer and blank.                                                                            |      |      |       |     |       |          |      |         |      |          |       |      |       |      |        |      |         |       |                                                                                                   |
| f Isotopic dates calculated using $\lambda_{238} = 1.55125E-10$ (Jaffey et al. 1971) and $\lambda_{235} = 9.8485E-10$ (Jaffey et al. 1971). |      |      |       |     |       |          |      |         |      |          |       |      |       |      |        |      |         |       |                                                                                                   |
|                                                                                                                                             |      |      |       |     |       |          |      |         |      |          |       |      |       |      |        |      |         |       | <b>MEAN UNIGE-PU-ETH: 43 analyses</b><br>100.1732 ± 0.0031 Ma [X] error, 2σ<br>MSWD = 2.6, N = 67 |

Tab S6: U-Pb results of ET2000 synthetic solution measured in University of Geneva, Princeton University and ETH Zürich labs

| Fraction                        | Composition   |               |                         | Isotopic Ratios |                   |                   |                 |                  |                 |                  |                 | Dates (Ma)     |                   |                      |                  |                      |                  |                      |
|---------------------------------|---------------|---------------|-------------------------|-----------------|-------------------|-------------------|-----------------|------------------|-----------------|------------------|-----------------|----------------|-------------------|----------------------|------------------|----------------------|------------------|----------------------|
|                                 | Pb*<br>(pg) a | Pbc<br>(pg) b | total<br>mass<br>Pb(pg) | Pb*/<br>Pbc c   | 206Pb/<br>204Pb d | 207Pb/<br>206Pb e | $\pm 2\sigma$ % | 207Pb/<br>235U e | $\pm 2\sigma$ % | 206Pb/<br>238U e | $\pm 2\sigma$ % | Corr.<br>coef. | 207Pb/<br>206Pb f | $\pm 2\sigma$<br>abs | 207Pb/<br>235U f | $\pm 2\sigma$<br>abs | 206Pb/<br>238U f | $\pm 2\sigma$<br>abs |
| <b>University of Geneva</b>     |               |               |                         |                 |                   |                   |                 |                  |                 |                  |                 |                |                   |                      |                  |                      |                  |                      |
| <b>ET2Ga SEM2 - 2008</b>        |               |               |                         |                 |                   |                   |                 |                  |                 |                  |                 |                |                   |                      |                  |                      |                  |                      |
| MO2000_2                        | 50.4          | 0.98          | 51.4                    | 52              | 3146              | 0.123170          | 0.10            | 6.1522           | 0.13            | 0.36242          | 0.07            | 0.61           | 2001.8            | 1.8                  | 1997.7           | 1.1                  | 1993.7           | 1.2                  |
| MO2000_3                        | 24.5          | 0.41          | 24.9                    | 60              | 3689              | 0.122930          | 0.13            | 6.1466           | 0.15            | 0.36280          | 0.09            | 0.44           | 1998.4            | 2.4                  | 1996.9           | 1.3                  | 1995.5           | 1.6                  |
| MO2000_4                        | 53.2          | 0.50          | 53.7                    | 107             | 6506              | 0.123070          | 0.09            | 6.1601           | 0.14            | 0.36319          | 0.10            | 0.77           | 2000.4            | 1.6                  | 1998.8           | 1.2                  | 1997.3           | 1.7                  |
| MO2000_6                        | 44.6          | 0.47          | 45.1                    | 95              | 5764              | 0.123079          | 0.06            | 6.1611           | 0.11            | 0.36322          | 0.07            | 0.80           | 2000.5            | 1.3                  | 1999.0           | 1.0                  | 1997.4           | 1.1                  |
| MO2000_7                        | 1230.0        | 8.19          | 1240.3                  | 150             | 9141              | 0.123040          | 0.04            | 6.1669           | 0.08            | 0.36368          | 0.05            | 0.76           | 2000.0            | 1.0                  | 1999.8           | 0.7                  | 1999.6           | 0.9                  |
| <b>ET2000 SEM3 - 2014</b>       |               |               |                         |                 |                   |                   |                 |                  |                 |                  |                 |                |                   |                      |                  |                      |                  |                      |
| MO2000_13                       | 91.9          | 0.96          | 92.8                    | 96              | 5844              | 0.123063          | 0.05            | 6.1633           | 0.10            | 0.36339          | 0.07            | 0.83           | 2000.3            | 1.0                  | 1999.3           | 0.9                  | 1998.2           | 1.3                  |
| MO2000_14                       | 199.0         | 1.72          | 201.1                   | 116             | 7047              | 0.122992          | 0.06            | 6.1628           | 0.10            | 0.36358          | 0.06            | 0.76           | 1999.3            | 1.2                  | 1999.2           | 0.9                  | 1999.1           | 1.0                  |
| MO2000_15                       | 67.8          | 0.70          | 68.5                    | 97              | 5902              | 0.123094          | 0.04            | 6.1741           | 0.07            | 0.36394          | 0.04            | 0.64           | 2000.8            | 0.9                  | 2000.8           | 0.6                  | 2000.8           | 0.6                  |
| MO2000_16                       | 83.9          | 0.80          | 84.7                    | 105             | 6356              | 0.123027          | 0.04            | 6.1659           | 0.08            | 0.36366          | 0.06            | 0.78           | 1999.8            | 0.9                  | 1999.6           | 0.7                  | 1999.5           | 1.0                  |
| MO2000_17                       | 104.0         | 0.91          | 105.2                   | 115             | 6970              | 0.123035          | 0.04            | 6.1624           | 0.09            | 0.36343          | 0.06            | 0.79           | 1999.9            | 1.0                  | 1999.1           | 0.8                  | 1998.4           | 1.1                  |
| MO2000_18                       | 86.0          | 0.82          | 86.9                    | 105             | 6387              | 0.123069          | 0.05            | 6.1744           | 0.09            | 0.36403          | 0.06            | 0.75           | 2000.4            | 1.0                  | 2000.8           | 0.8                  | 2001.3           | 1.0                  |
| MO2000_19                       | 92.5          | 0.86          | 93.3                    | 107             | 6515              | 0.123050          | 0.08            | 6.1700           | 0.17            | 0.36381          | 0.13            | 0.88           | 2000.1            | 1.5                  | 2000.2           | 1.5                  | 2000.2           | 2.3                  |
| MO2000_20                       | 120.0         | 0.95          | 120.8                   | 126             | 7659              | 0.123047          | 0.04            | 6.1627           | 0.11            | 0.36341          | 0.09            | 0.88           | 2000.1            | 0.9                  | 1999.2           | 1.0                  | 1998.3           | 1.6                  |
| MO2000_21                       | 111.0         | 0.95          | 112.4                   | 117             | 7098              | 0.123008          | 0.04            | 6.1670           | 0.08            | 0.36377          | 0.06            | 0.79           | 1999.5            | 0.8                  | 1999.8           | 0.7                  | 2000.0           | 1.0                  |
| MO2000_22                       | 108.0         | 0.94          | 108.6                   | 114             | 6952              | 0.123033          | 0.05            | 6.1671           | 0.10            | 0.36371          | 0.07            | 0.82           | 1999.9            | 1.1                  | 1999.8           | 0.9                  | 1999.7           | 1.2                  |
| MO2000_23                       | 103.0         | 0.92          | 103.6                   | 111             | 6758              | 0.123020          | 0.04            | 6.1655           | 0.08            | 0.36365          | 0.05            | 0.78           | 1999.7            | 0.9                  | 1999.6           | 0.7                  | 1999.5           | 0.9                  |
| MO2000_24                       | 97.6          | 0.91          | 98.5                    | 107             | 6530              | 0.123048          | 0.05            | 6.1709           | 0.08            | 0.36389          | 0.05            | 0.74           | 2000.1            | 1.0                  | 2000.3           | 0.7                  | 2000.6           | 0.9                  |
| MO2000_25                       | 190.0         | 1.26          | 191.3                   | 151             | 9155              | 0.123040          | 0.01            | 6.1696           | 0.05            | 0.36384          | 0.03            | 0.84           | 2000.0            | 0.6                  | 2000.2           | 0.5                  | 2000.3           | 0.5                  |
| MO2000_26                       | 153.0         | 1.09          | 153.9                   | 140             | 8497              | 0.123062          | 0.04            | 6.1753           | 0.09            | 0.36411          | 0.07            | 0.84           | 2000.3            | 0.8                  | 2001.0           | 0.8                  | 2001.6           | 1.2                  |
| MO2000_27                       | 193.0         | 1.29          | 194.1                   | 150             | 9098              | 0.123091          | 0.03            | 6.1775           | 0.06            | 0.36415          | 0.03            | 0.66           | 2000.7            | 0.8                  | 2001.3           | 0.5                  | 2001.8           | 0.6                  |
| MO2000_28                       | 315.0         | 1.78          | 316.7                   | 177             | 10726             | 0.122998          | 0.04            | 6.1682           | 0.08            | 0.36388          | 0.06            | 0.81           | 1999.4            | 0.9                  | 2000.0           | 0.7                  | 2000.5           | 1.0                  |
| MO2000_30                       | 346.0         | 1.89          | 348.3                   | 183             | 11139             | 0.122977          | 0.04            | 6.1497           | 0.12            | 0.36285          | 0.10            | 0.90           | 1999.1            | 0.9                  | 1997.3           | 1.0                  | 1995.6           | 1.7                  |
| MO2000_31                       | 289.0         | 1.60          | 290.9                   | 181             | 10968             | 0.123019          | 0.05            | 6.1669           | 0.13            | 0.36374          | 0.11            | 0.90           | 1999.7            | 1.0                  | 1999.8           | 1.2                  | 1999.9           | 2.0                  |
| <b>ET2000 SEM4 - May 2015</b>   |               |               |                         |                 |                   |                   |                 |                  |                 |                  |                 |                |                   |                      |                  |                      |                  |                      |
| MO2000_32                       | 265.0         | 1.40          | 266.4                   | 189             | 11484             | 0.123038          | 0.03            | 6.1628           | 0.07            | 0.36344          | 0.05            | 0.79           | 1999.9            | 0.8                  | 1999.2           | 0.7                  | 1998.5           | 0.9                  |
| MO2000_33s                      | 332.0         | 1.77          | 333.7                   | 187             | 11377             | 0.123011          | 0.02            | 6.1712           | 0.06            | 0.36402          | 0.04            | 0.76           | 1999.6            | 0.7                  | 2000.4           | 0.5                  | 2001.2           | 0.7                  |
| MO2000_34                       | 419.0         | 2.20          | 421.3                   | 190             | 11563             | 0.123041          | 0.03            | 6.1660           | 0.20            | 0.36361          | 0.19            | 0.98           | 2000.0            | 0.8                  | 1999.6           | 1.7                  | 1999.3           | 3.3                  |
| MO2000_35                       | 592.0         | 3.02          | 594.9                   | 196             | 11905             | 0.123079          | 0.04            | 6.1606           | 0.09            | 0.36319          | 0.06            | 0.79           | 2000.5            | 1.0                  | 1998.9           | 0.8                  | 1997.3           | 1.1                  |
| MO2000_36                       | 502.0         | 2.56          | 504.2                   | 196             | 11894             | 0.123026          | 0.03            | 6.1608           | 0.06            | 0.36336          | 0.04            | 0.72           | 1999.8            | 0.8                  | 1998.9           | 0.5                  | 1998.1           | 0.7                  |
| MO2000_37                       | 296.0         | 1.53          | 297.8                   | 193             | 11735             | 0.123026          | 0.03            | 6.1702           | 0.06            | 0.36391          | 0.04            | 0.70           | 1999.8            | 0.8                  | 2000.2           | 0.5                  | 2000.7           | 0.7                  |
| <b>ET2000 SEM5 - March 2016</b> |               |               |                         |                 |                   |                   |                 |                  |                 |                  |                 |                |                   |                      |                  |                      |                  |                      |
| MO2000_42                       | 769.0         | 4.03          | 773.0                   | 191             | 11588             | 0.123024          | 0.04            | 6.1548           | 0.09            | 0.36301          | 0.07            | 0.84           | 1999.7            | 0.9                  | 1998.1           | 0.8                  | 1996.4           | 1.2                  |
| MO2000_43                       | 1010.0        | 5.16          | 1018.5                  | 196             | 11921             | 0.123087          | 0.03            | 6.1827           | 0.13            | 0.36447          | 0.12            | 0.95           | 2000.7            | 0.8                  | 2002.0           | 1.1                  | 2003.3           | 2.1                  |
| MO2000_44                       | 763.0         | 4.02          | 767.0                   | 190             | 11536             | 0.123002          | 0.03            | 6.1687           | 0.09            | 0.36389          | 0.07            | 0.85           | 1999.4            | 0.8                  | 2000.0           | 0.8                  | 2000.6           | 1.2                  |
| MO2000_45                       | 801.0         | 4.18          | 804.8                   | 191             | 11632             | 0.123039          | 0.03            | 6.1861           | 0.07            | 0.36481          | 0.05            | 0.78           | 2000.0            | 0.8                  | 2002.5           | 0.6                  | 2004.9           | 0.9                  |
| MO2000_46                       | 877.0         | 4.40          | 881.5                   | 199             | 12104             | 0.123055          | 0.02            | 6.1714           | 0.06            | 0.36390          | 0.04            | 0.74           | 2000.2            | 0.7                  | 2000.4           | 0.51                 | 2000.6           | 0.6                  |



**Table S7: U-Pb isotope results from natural reference zircon materials Temora-2 and JG-1 at University of Geneva**

|                                                                      |                | Composition           |                       |                             |                      | Isotopic Ratios  |                                                                |                                                                |       |                                                               |       |                                                               |       | Dates (Ma)  |                                                                |         |                                                               |         |                                                               |         |                                                               |         |                                                               |         |                                          |  |
|----------------------------------------------------------------------|----------------|-----------------------|-----------------------|-----------------------------|----------------------|------------------|----------------------------------------------------------------|----------------------------------------------------------------|-------|---------------------------------------------------------------|-------|---------------------------------------------------------------|-------|-------------|----------------------------------------------------------------|---------|---------------------------------------------------------------|---------|---------------------------------------------------------------|---------|---------------------------------------------------------------|---------|---------------------------------------------------------------|---------|------------------------------------------|--|
| Fraction                                                             | Running number | Pb* (pg) <sub>a</sub> | Pbc (pg) <sub>b</sub> | total Pbc (pg) <sub>c</sub> | Pb*/Pbc <sub>c</sub> | Th/ <sub>d</sub> | <sup>206</sup> Pb/ <sub>e</sub> <sup>208</sup> Pb <sub>e</sub> | <sup>207</sup> Pb/ <sub>f</sub> <sup>208</sup> Pb <sub>f</sub> | ±2σ % | <sup>207</sup> Pb/ <sub>g</sub> <sup>235</sup> U <sub>g</sub> | ±2σ % | <sup>206</sup> Pb/ <sub>h</sub> <sup>238</sup> U <sub>h</sub> | ±2σ % | Corr. coef. | <sup>207</sup> Pb/ <sub>i</sub> <sup>206</sup> Pb <sub>i</sub> | ±2σ abs | <sup>207</sup> Pb/ <sub>j</sub> <sup>235</sup> U <sub>j</sub> | ±2σ abs | <sup>206</sup> Pb/ <sub>k</sub> <sup>238</sup> U <sub>k</sub> | ±2σ abs | <sup>206</sup> Pb/ <sub>l</sub> <sup>238</sup> U <sub>l</sub> | ±2σ abs | <sup>206</sup> Pb/ <sub>m</sub> <sup>238</sup> U <sub>m</sub> | ±2σ abs | Mean age calculations (not Th-corrected) |  |
| <b>TEMORA-2</b>                                                      |                |                       |                       |                             |                      |                  |                                                                |                                                                |       |                                                               |       |                                                               |       |             |                                                                |         |                                                               |         |                                                               |         |                                                               |         |                                                               |         |                                          |  |
| <i>TRITON Temora 2535 (bottle 1), SEM 4, dec 2014 180°C abrasion</i> |                |                       |                       |                             |                      |                  |                                                                |                                                                |       |                                                               |       |                                                               |       |             |                                                                |         |                                                               |         |                                                               |         |                                                               |         |                                                               |         |                                          |  |
| 11573                                                                | 1              | 72.8                  | 0.22                  | 73.01                       | 337.74               | 0.35             | 21139                                                          | 0.05512                                                        | 0.08  | 0.50807                                                       | 0.10  | 0.066880                                                      | 0.04  | 0.54        | 416.2                                                          | 1.9     | 417.15                                                        | 0.34    | 417.33                                                        | 0.17    | 417.42                                                        | 0.17    | 417.34 ± 0.07 Ma [X]-error, 2σ<br>MSWD = 1.7, N = 8           |         |                                          |  |
| 11838                                                                | 2              | 44.1                  | 0.21                  | 44.36                       | 208.49               | 0.36             | 13013                                                          | 0.05507                                                        | 0.14  | 0.50768                                                       | 0.18  | 0.066896                                                      | 0.06  | 0.73        | 413.9                                                          | 3.2     | 416.89                                                        | 0.62    | 417.43                                                        | 0.24    | 417.52                                                        | 0.24    |                                                               |         |                                          |  |
| 11839                                                                | 3              | 55.4                  | 0.73                  | 56.18                       | 75.68                | 0.50             | 4565                                                           | 0.05514                                                        | 0.20  | 0.50800                                                       | 0.21  | 0.066850                                                      | 0.05  | 0.25        | 416.8                                                          | 4.6     | 417.10                                                        | 0.72    | 417.15                                                        | 0.20    | 417.24                                                        | 0.20    |                                                               |         |                                          |  |
| 11845                                                                | 4              | 142.7                 | 0.21                  | 142.94                      | 695.21               | 0.32             | 43818                                                          | 0.05513                                                        | 0.06  | 0.50814                                                       | 0.08  | 0.066882                                                      | 0.03  | 0.67        | 416.4                                                          | 1.5     | 417.20                                                        | 0.28    | 417.34                                                        | 0.14    | 417.44                                                        | 0.14    |                                                               |         |                                          |  |
| 11846                                                                | 5              | 47.2                  | 0.22                  | 47.45                       | 219.10               | 0.41             | 13476                                                          | 0.05514                                                        | 0.08  | 0.50844                                                       | 0.10  | 0.066906                                                      | 0.04  | 0.59        | 416.9                                                          | 2.0     | 417.40                                                        | 0.36    | 417.49                                                        | 0.15    | 417.58                                                        | 0.15    |                                                               |         |                                          |  |
| <i>PHOENIX Temora 2535 (bottle 1), dec 2014 180°C abrasion</i>       |                |                       |                       |                             |                      |                  |                                                                |                                                                |       |                                                               |       |                                                               |       |             |                                                                |         |                                                               |         |                                                               |         |                                                               |         |                                                               |         |                                          |  |
| 378                                                                  | 6              | 79.4                  | 0.74                  | 80.17                       | 107.61               | 0.44             | 6298                                                           | 0.05515                                                        | 0.09  | 0.50900                                                       | 0.41  | 0.066970                                                      | 0.40  | 0.97        | 417.1                                                          | 2.1     | 417.70                                                        | 1.40    | 417.90                                                        | 1.60    | 417.90                                                        | 1.60    |                                                               |         |                                          |  |
| 379                                                                  | 7              | 110.3                 | 4.36                  | 114.62                      | 25.26                | 0.36             | 1525                                                           | 0.05504                                                        | 0.28  | 0.50700                                                       | 0.31  | 0.066844                                                      | 0.08  | 0.51        | 412.8                                                          | 6.2     | 416.40                                                        | 1.10    | 417.11                                                        | 0.33    | 417.20                                                        | 0.33    |                                                               |         |                                          |  |
| 380                                                                  | 8              | 36.3                  | 1.33                  | 37.64                       | 27.21                | 0.41             | 1620                                                           | 0.05520                                                        | 0.24  | 0.50860                                                       | 0.28  | 0.066858                                                      | 0.07  | 0.64        | 419.2                                                          | 5.5     | 417.50                                                        | 0.97    | 417.20                                                        | 0.26    | 417.29                                                        | 0.26    |                                                               |         |                                          |  |
| <i>TRITON Temora 535 SEM 5 nov 2017 180°C abrasion</i>               |                |                       |                       |                             |                      |                  |                                                                |                                                                |       |                                                               |       |                                                               |       |             |                                                                |         |                                                               |         |                                                               |         |                                                               |         |                                                               |         |                                          |  |
| 13718s                                                               | 9              | 107.4                 | 1.71                  | 109.13                      | 62.93                | 0.41             | 3746                                                           | 0.05527                                                        | 0.43  | 0.50940                                                       | 0.45  | 0.066871                                                      | 0.06  | 0.44        | 422.3                                                          | 9.6     | 418.00                                                        | 1.60    | 417.28                                                        | 0.26    | 417.37                                                        | 0.26    | 417.26 ± 0.13 Ma [X]-error, 95% c.i.<br>MSWD = 3.4, N = 20    |         |                                          |  |
| 13719                                                                | 10             | 63.2                  | 1.40                  | 64.56                       | 45.03                | 0.37             | 2711                                                           | 0.05529                                                        | 0.59  | 0.50920                                                       | 0.62  | 0.066821                                                      | 0.08  | 0.42        | 423.0                                                          | 13.0    | 417.90                                                        | 2.10    | 416.98                                                        | 0.32    | 417.07                                                        | 0.32    |                                                               |         |                                          |  |
| 13720                                                                | 11             | 21.0                  | 1.79                  | 22.80                       | 11.76                | 0.43             | 710                                                            | 0.05550                                                        | 2.30  | 0.51100                                                       | 2.40  | 0.066897                                                      | 0.12  | 0.70        | 430.0                                                          | 51.0    | 419.40                                                        | 8.10    | 417.44                                                        | 0.49    | 417.53                                                        | 0.49    |                                                               |         |                                          |  |
| 13721                                                                | 12             | 33.9                  | 2.98                  | 36.92                       | 11.39                | 0.38             | 696                                                            | 0.05560                                                        | 2.30  | 0.51400                                                       | 2.40  | 0.066956                                                      | 0.12  | 0.70        | 437.0                                                          | 51.0    | 420.80                                                        | 8.20    | 417.79                                                        | 0.48    | 417.88                                                        | 0.48    |                                                               |         |                                          |  |
| 13722                                                                | 13             | 39.4                  | 1.13                  | 40.54                       | 34.95                | 0.49             | 2041                                                           | 0.05534                                                        | 0.78  | 0.51050                                                       | 0.82  | 0.066936                                                      | 0.06  | 0.56        | 425.0                                                          | 18.0    | 418.80                                                        | 2.80    | 417.67                                                        | 0.25    | 417.76                                                        | 0.25    |                                                               |         |                                          |  |
| 13723                                                                | 14             | 101.8                 | 3.61                  | 105.46                      | 28.23                | 0.39             | 1697                                                           | 0.05534                                                        | 0.94  | 0.50980                                                       | 0.98  | 0.066842                                                      | 0.07  | 0.56        | 425.0                                                          | 21.0    | 418.30                                                        | 3.40    | 417.10                                                        | 0.28    | 417.19                                                        | 0.28    |                                                               |         |                                          |  |
| 13724                                                                | 15             | 40.0                  | 1.27                  | 41.26                       | 31.38                | 0.39             | 1883                                                           | 0.05535                                                        | 0.85  | 0.50970                                                       | 0.90  | 0.066817                                                      | 0.12  | 0.40        | 425.0                                                          | 19.0    | 418.20                                                        | 3.10    | 416.95                                                        | 0.50    | 417.04                                                        | 0.49    |                                                               |         |                                          |  |
| 13725                                                                | 16             | 29.5                  | 1.68                  | 31.22                       | 17.60                | 0.36             | 1074                                                           | 0.05549                                                        | 1.50  | 0.51140                                                       | 1.50  | 0.066879                                                      | 0.09  | 0.63        | 431.0                                                          | 33.0    | 419.40                                                        | 5.30    | 417.32                                                        | 0.36    | 417.42                                                        | 0.36    |                                                               |         |                                          |  |
| <i>PHOENIX Temora 535 nov 2017 180°C abrasion</i>                    |                |                       |                       |                             |                      |                  |                                                                |                                                                |       |                                                               |       |                                                               |       |             |                                                                |         |                                                               |         |                                                               |         |                                                               |         |                                                               |         |                                          |  |
| 564                                                                  | 17             | 14.3                  | 0.95                  | 15.29                       | 15.05                | 0.40             | 897                                                            | 0.05520                                                        | 1.80  | 0.50920                                                       | 1.90  | 0.066933                                                      | 0.11  | 0.61        | 419.0                                                          | 40.0    | 417.90                                                        | 6.40    | 417.65                                                        | 0.44    | 417.74                                                        | 0.44    |                                                               |         |                                          |  |
| 570                                                                  | 18             | 10.4                  | 0.47                  | 10.86                       | 22.13                | 0.32             | 1340                                                           | 0.05518                                                        | 1.20  | 0.50890                                                       | 1.30  | 0.066922                                                      | 0.09  | 0.56        | 418.0                                                          | 27.0    | 417.70                                                        | 4.30    | 417.58                                                        | 0.38    | 417.67                                                        | 0.38    |                                                               |         |                                          |  |
| 571                                                                  | 19             | 164.7                 | 0.82                  | 165.55                      | 201.02               | 0.42             | 11700                                                          | 0.05518                                                        | 1.14  | 0.50846                                                       | 0.17  | 0.066863                                                      | 0.06  | 0.56        | 418.5                                                          | 3.3     | 417.42                                                        | 0.59    | 417.23                                                        | 0.25    | 417.32                                                        | 0.25    |                                                               |         |                                          |  |
| 583                                                                  | 20             | 22.5                  | 0.78                  | 23.31                       | 28.92                | 0.43             | 1695                                                           | 0.05539                                                        | 0.94  | 0.51030                                                       | 0.98  | 0.066848                                                      | 0.07  | 0.58        | 427.0                                                          | 21.0    | 418.60                                                        | 3.40    | 417.14                                                        | 0.27    | 417.23                                                        | 0.27    |                                                               |         |                                          |  |
| 584                                                                  | 21             | 52.8                  | 0.78                  | 53.59                       | 67.51                | 0.38             | 3982                                                           | 0.05533                                                        | 0.40  | 0.50950                                                       | 0.42  | 0.066809                                                      | 0.05  | 0.46        | 424.7                                                          | 9.0     | 418.10                                                        | 1.50    | 416.90                                                        | 0.21    | 416.99                                                        | 0.21    |                                                               |         |                                          |  |
| 587                                                                  | 22             | 19.7                  | 1.48                  | 21.17                       | 13.34                | 0.46             | 784                                                            | 0.05490                                                        | 2.10  | 0.50600                                                       | 2.20  | 0.066821                                                      | 0.11  | 0.67        | 408.0                                                          | 46.0    | 415.70                                                        | 7.30    | 416.98                                                        | 0.46    | 417.06                                                        | 0.46    |                                                               |         |                                          |  |
| 666                                                                  | 23             | 29.1                  | 0.59                  | 29.66                       | 49.65                | 0.46             | 2873                                                           | 0.05521                                                        | 0.56  | 0.50910                                                       | 0.58  | 0.066908                                                      | 0.06  | 0.47        | 420.0                                                          | 12.0    | 417.90                                                        | 2.00    | 417.50                                                        | 0.23    | 417.59                                                        | 0.23    |                                                               |         |                                          |  |
| 667                                                                  | 24             | 52.8                  | 0.93                  | 53.74                       | 57.09                | 0.35             | 3396                                                           | 0.05523                                                        | 0.47  | 0.50890                                                       | 0.49  | 0.066855                                                      | 0.05  | 0.48        | 421.0                                                          | 11.0    | 417.70                                                        | 1.70    | 417.18                                                        | 0.21    | 417.27                                                        | 0.21    |                                                               |         |                                          |  |
| 668                                                                  | 25             | 12.7                  | 1.01                  | 13.67                       | 12.53                | 0.35             | 759                                                            | 0.05610                                                        | 2.10  | 0.51700                                                       | 2.20  | 0.066935                                                      | 0.11  | 0.69        | 454.0                                                          | 47.0    | 423.30                                                        | 7.50    | 417.67                                                        | 0.45    | 417.76                                                        | 0.45    |                                                               |         |                                          |  |
| 670                                                                  | 26             | 28.6                  | 0.97                  | 29.52                       | 29.58                | 0.39             | 1749                                                           | 0.05549                                                        | 0.91  | 0.51130                                                       | 0.95  | 0.066851                                                      | 0.07  | 0.57        | 431.0                                                          | 20.0    | 419.30                                                        | 3.30    | 417.16                                                        | 0.26    | 417.25                                                        | 0.26    |                                                               |         |                                          |  |
| 671                                                                  | 27             | 25.9                  | 1.32                  | 27.24                       | 19.56                | 0.49             | 1133                                                           | 0.05573                                                        | 1.40  | 0.51430                                                       | 1.50  | 0.066958                                                      | 0.09  | 0.61        | 441.0                                                          | 31.0    | 421.30                                                        | 5.00    | 417.80                                                        | 0.36    | 417.89                                                        | 0.36    |                                                               |         |                                          |  |
| 758                                                                  | 28             | 111.2                 | 0.51                  | 111.74                      | 218.43               | 0.42             | 12702                                                          | 0.05521                                                        | 0.13  | 0.50848                                                       | 0.16  | 0.066833                                                      | 0.05  | 0.60        | 419.5                                                          | 3.1     | 417.43                                                        | 0.55    | 417.05                                                        | 0.20    | 417.14                                                        | 0.20    |                                                               |         |                                          |  |
| <i>TRITON Temora 2535 (bottle 2) SEM 5 nov 2017 210°C abrasion</i>   |                |                       |                       |                             |                      |                  |                                                                |                                                                |       |                                                               |       |                                                               |       |             |                                                                |         |                                                               |         |                                                               |         |                                                               |         |                                                               |         |                                          |  |
| 13758                                                                | 29             | 58.2                  | 0.23                  | 58.46                       | 250.04               | 0.37             | 15551                                                          | 0.05519                                                        | 0.08  | 0.50868                                                       | 0.11  | 0.066873                                                      | 0.03  | 0.68        | 419.1                                                          | 2.0     | 417.56                                                        | 0.36    | 417.29                                                        | 0.12    | 417.38                                                        | 0.12    | 417.23 ± 0.14 Ma [X]-error, 95% c.i.<br>MSWD = 5.6, N = 11    |         |                                          |  |
| 13759                                                                | 30             | 20.9                  | 0.54                  | 21.46                       | 38.48                | 0.34             | 2429                                                           | 0.05519                                                        | 0.37  | 0.50870                                                       | 0.40  | 0.066885                                                      | 0.05  | 0.66        | 418.7                                                          | 8.3     | 417.60                                                        | 1.40    | 417.36                                                        | 0.20    | 417.45                                                        | 0.20    |                                                               |         |                                          |  |
| 13760                                                                | 31             | 23.6                  | 0.39                  | 23.99                       | 61.29                | 0.36             | 3838                                                           | 0.05513                                                        | 0.24  | 0.50740                                                       | 0.26  | 0.066783                                                      | 0.04  | 0.57        | 416.6                                                          | 5.4     | 416.73                                                        | 0.90    | 416.74                                                        | 0.16    | 416.84                                                        | 0.16    |                                                               |         |                                          |  |
| 13761                                                                | 32             | 25.5                  | 0.17                  | 25.68                       | 152.02               | 0.51             | 9114                                                           | 0.05513                                                        | 0.13  | 0.50790                                                       | 0.15  | 0.066854                                                      | 0.04  | 0.61        | 416.3                                                          | 3.0     | 417.04                                                        | 0.52    | 417.17                                                        | 0.15    | 417.26                                                        | 0.15    |                                                               |         |                                          |  |
| 13762                                                                | 33             | 10.3                  | 0.19                  | 10.52                       | 53.73                | 0.49             | 3252                                                           | 0.05516                                                        | 0.29  | 0.50850                                                       | 0.32  | 0.066886                                                      | 0.04  | 0.72        | 417.8                                                          | 6.4     | 417.40                                                        | 1.10    | 417.37                                                        | 0.17    | 417.46                                                        | 0.17    |                                                               |         |                                          |  |
| 13763                                                                | 34             | 14.5                  | 0.73                  | 15.25                       | 19.87                | 0.45             | 1227                                                           | 0.05524                                                        | 0.72  | 0.51060                                                       | 0.77  | 0.067070                                                      | 0.09  | 0.63        | 421.0                                                          | 16.0    | 418.90                                                        | 2.70    | 418.48                                                        | 0.36    | 418.57                                                        | 0.36    |                                                               |         |                                          |  |
| 13770                                                                | 35             | 11.1                  | 0.20                  | 11.33                       | 56.34                | 0.34             | 3549                                                           | 0.05501                                                        | 0.29  | 0.50690                                                       | 0.33  | 0.066869                                                      | 0.04  | 0.79        | 411.5                                                          | 6.6     | 416.40                                                        | 1.10    | 417.26                                                        | 0.18    | 417.35                                                        | 0.18    |                                                               |         |                                          |  |
| <i>PHOENIX Temora 2535 (bottle 2) nov 2017 210°C abrasion</i>        |                |                       |                       |                             |                      |                  |                                                                |                                                                |       |                                                               |       |                                                               |       |             |                                                                |         |                                                               |         |                                                               |         |                                                               |         |                                                               |         |                                          |  |
| 897                                                                  | 36             | 10.2                  | 1.20                  | 11.39                       | 8.49                 | 0.33             | 551                                                            | 0.05507                                                        | 1.60  | 0.50750                                                       | 1.70  | 0.066870                                                      | 0.15  | 0.73        | 414.0                                                          | 36.0    | 416.80                                                        | 5.90    | 417.25                                                        | 0.62    | 417.34                                                        | 0.62    |                                                               |         |                                          |  |
| 898                                                                  | 37             | 20.2                  | 0.67                  | 20.85                       | 29.89                | 0.39             | 1865                                                           | 0.05513                                                        | 0.47  | 0.50990                                                       | 0.50  | 0.067104                                                      | 0.05  | 0.64        | 417.0                                                          | 10.0    | 418.40                                                        | 1.70    | 418.68                                                        | 0.21    | 418.77                                                        | 0.21    |                                                               |         |                                          |  |
| 899                                                                  | 38             | 11.1                  | 0.88                  | 11.95                       | 12.63                | 0.37             | 804                                                            | 0.05526                                                        | 1.10  | 0.50950                                                       | 1.20  | 0.066900                                                      | 0.11  | 0.71        | 422.0                                                          | 25.0    | 418.10                                                        | 4.00    | 417.45                                                        | 0.45    | 417.54                                                        | 0.45    |                                                               |         |                                          |  |
| 900                                                                  | 39             | 39.1                  | 0.56                  | 39.71                       | 69.74                | 0.42             | 4293                                                           | 0.05513                                                        | 0.20  | 0.50810                                                       | 0.22  | 0.066868                                                      | 0.03  | 0.53        | 416.5                                                          | 4.6     | 417.15                                                        | 0.76    | 417.26                                                        | 0.14    | 417.35                                                        | 0.14    |                                                               |         |                                          |  |
| 901                                                                  | 40             | 29.7                  | 0.55                  | 30.26                       | 53.54                | 0.49             | 3243                                                           | 0.05506                                                        | 0.27  | 0.50770                                                       | 0.29  | 0.066909                                                      | 0.04  | 0.49        | 413.7                                                          | 6.2     | 416.90                                                        | 1.00    | 417.51                                                        | 0.18    | 417.60                                                        | 0.18    |                                                               |         |                                          |  |
| 902                                                                  | 41             | 16.4                  | 0.71                  | 17.09                       | 22.94                | 0.36             | 1449                                                           | 0.05508                                                        | 0.60  | 0.50890                                                       | 0.64  | 0.067036                                                      | 0.07  | 0.67        | 415.0                                                          | 13.0    | 417.70                                                        | 2.20    | 418.27                                                        | 0.27    | 418.36                                                        | 0.26    |                                                               |         |                                          |  |
| 903                                                                  | 42             | 8.3                   | 0.71                  | 9.03                        | 11.66                | 0.48             | 722                                                            | 0.05531                                                        | 1.20  | 0.50930                                                       | 1.30  | 0.066808                                                      | 0.13  | 0.67        | 424.0                                                          | 27.0    | 418.00                                                        | 4.40    | 416.89                                                        | 0.52    | 416.98                                                        | 0.52    |                                                               |         |                                          |  |
| <i>TRITON Temora 2535 (bottle 2) SEM 5 oct 2020; 210°C abrasion</i>  |                |                       |                       |                             |                      |                  |                                                                |                                                                |       |                                                               |       |                                                               |       |             |                                                                |         |                                                               |         |                                                               |         |                                                               |         |                                                               |         |                                          |  |
| tem2_s17                                                             | 43             | 70.9                  | 4.90                  | 75.77                       | 14.46                | 0.50             | 849                                                            | 0.05575                                                        | 0.43  | 0.51500                                                       | 0.47  | 0.067030                                                      | 0.07  | 0.61        | 441.4                                                          | 9.6     | 421.80                                                        | 1.6     |                                                               |         |                                                               |         |                                                               |         |                                          |  |

|                                                                |    |       |      |        |         |      |       |         |      |         |      |          |      |      |       |      |        |      |        |      |        |      |
|----------------------------------------------------------------|----|-------|------|--------|---------|------|-------|---------|------|---------|------|----------|------|------|-------|------|--------|------|--------|------|--------|------|
| Temora2_z30                                                    | 55 | 18.1  | 0.26 | 18.33  | 68.28   | 0.35 | 4101  | 0.05515 | 0.23 | 0.50880 | 0.27 | 0.066941 | 0.06 | 0.73 | 417.4 | 5.1  | 417.65 | 0.91 | 417.70 | 0.22 | 417.79 | 0.22 |
| PHOENIX Temora 2535 (bottle 2) oct 2020: 210°C Abrasion        |    |       |      |        |         |      |       |         |      |         |      |          |      |      |       |      |        |      |        |      |        |      |
| Temora-2_S9                                                    | 56 | 28.2  | 1.10 | 29.34  | 25.63   | 0.42 | 1523  | 0.05518 | 0.31 | 0.50848 | 0.31 | 0.066866 | 0.05 | 0.16 | 418.4 | 6.9  | 417.43 | 1.07 | 417.25 | 0.18 | 417.34 | 0.18 |
| Temora-2_S10                                                   | 57 | 33.4  | 1.45 | 34.87  | 23.04   | 0.39 | 1380  | 0.05528 | 0.30 | 0.51030 | 0.30 | 0.066979 | 0.05 | 0.15 | 422.6 | 6.7  | 418.65 | 1.05 | 417.93 | 0.19 | 418.02 | 0.19 |
| Temora-2_S11                                                   | 58 | 13.2  | 0.84 | 14.03  | 15.63   | 0.43 | 931   | 0.05538 | 0.46 | 0.50796 | 0.46 | 0.066554 | 0.06 | 0.11 | 426.6 | 10.3 | 417.08 | 1.58 | 415.36 | 0.23 | 415.45 | 0.23 |
| Temora-2_S12                                                   | 59 | 103.5 | 0.87 | 104.33 | 118.68  | 0.42 | 6983  | 0.05517 | 0.06 | 0.50849 | 0.08 | 0.066871 | 0.03 | 0.38 | 418.3 | 1.6  | 417.43 | 0.26 | 417.28 | 0.11 | 417.37 | 0.11 |
| Temora-2_S13                                                   | 60 | 62.2  | 0.69 | 62.88  | 89.64   | 0.39 | 5327  | 0.05526 | 0.09 | 0.50937 | 0.10 | 0.066887 | 0.03 | 0.28 | 421.6 | 2.1  | 418.03 | 0.34 | 417.38 | 0.11 | 417.47 | 0.11 |
| Temora-2_S14                                                   | 61 | 96.0  | 0.48 | 96.50  | 201.79  | 0.37 | 12006 | 0.05516 | 0.04 | 0.50857 | 0.06 | 0.066894 | 0.03 | 0.45 | 417.9 | 1.2  | 417.49 | 0.20 | 417.42 | 0.11 | 417.51 | 0.11 |
| Temora-2_S16                                                   | 62 | 36.7  | 0.80 | 37.50  | 45.95   | 0.40 | 2727  | 0.05528 | 0.15 | 0.50947 | 0.15 | 0.066876 | 0.03 | 0.17 | 422.4 | 3.4  | 418.09 | 0.53 | 417.30 | 0.12 | 417.39 | 0.12 |
| PHOENIX Temora 2535 (bottle 2) oct 2020 180°C Abrasion         |    |       |      |        |         |      |       |         |      |         |      |          |      |      |       |      |        |      |        |      |        |      |
| Temora-2_S1                                                    | 63 | 43.0  | 0.89 | 43.87  | 48.28   | 0.46 | 2823  | 0.05532 | 0.16 | 0.51010 | 0.16 | 0.066907 | 0.03 | 0.15 | 424.2 | 3.6  | 418.52 | 0.55 | 417.49 | 0.13 | 417.58 | 0.13 |
| Temora-2_S2                                                    | 64 | 18.1  | 0.29 | 18.36  | 62.94   | 0.35 | 3785  | 0.05526 | 0.12 | 0.50954 | 0.12 | 0.066907 | 0.03 | 0.23 | 421.7 | 2.7  | 418.14 | 0.42 | 417.49 | 0.12 | 417.59 | 0.12 |
| Temora-2_S3                                                    | 65 | 26.6  | 0.45 | 27.03  | 58.43   | 0.45 | 3421  | 0.05529 | 0.13 | 0.50974 | 0.14 | 0.066893 | 0.03 | 0.28 | 423.1 | 3.0  | 418.28 | 0.47 | 417.41 | 0.12 | 417.50 | 0.12 |
| Temora-2_S4                                                    | 66 | 42.1  | 0.39 | 42.51  | 109.30  | 0.35 | 6558  | 0.05522 | 0.08 | 0.50865 | 0.10 | 0.066840 | 0.05 | 0.59 | 420.0 | 1.8  | 417.54 | 0.35 | 417.09 | 0.19 | 417.18 | 0.19 |
| Temora-2_S5                                                    | 67 | 19.4  | 0.81 | 20.22  | 23.87   | 0.41 | 1420  | 0.05543 | 0.29 | 0.51018 | 0.30 | 0.066781 | 0.05 | 0.20 | 428.7 | 6.6  | 418.57 | 1.03 | 416.74 | 0.18 | 416.83 | 0.19 |
| Temora-2_S6                                                    | 68 | 20.6  | 0.93 | 21.52  | 22.13   | 0.40 | 1325  | 0.05539 | 0.31 | 0.51113 | 0.31 | 0.066958 | 0.05 | 0.11 | 427.0 | 7.0  | 419.21 | 1.08 | 417.80 | 0.19 | 417.89 | 0.19 |
| Temora-2_S7                                                    | 69 | 8.9   | 0.30 | 9.18   | 29.13   | 0.45 | 1714  | 0.05491 | 0.31 | 0.50521 | 0.34 | 0.066760 | 0.07 | 0.43 | 407.5 | 7.0  | 415.22 | 1.15 | 416.61 | 0.30 | 416.70 | 0.30 |
| Temora-2_S8                                                    | 70 | 11.7  | 0.45 | 12.15  | 26.12   | 0.47 | 1530  | 0.05509 | 0.38 | 0.51021 | 0.45 | 0.067197 | 0.20 | 0.50 | 415.0 | 8.6  | 418.59 | 1.53 | 419.24 | 0.82 | 419.33 | 0.82 |
| <b>Grand mean Temora-2:</b>                                    |    |       |      |        |         |      |       |         |      |         |      |          |      |      |       |      |        |      |        |      |        |      |
| N=60,                                                          |    |       |      |        |         |      |       |         |      |         |      |          |      |      |       |      |        |      |        |      |        |      |
| Th-corrected: 417.492 ± 0.054 Ma                               |    |       |      |        |         |      |       |         |      |         |      |          |      |      |       |      |        |      |        |      |        |      |
| <b>GJ-1</b>                                                    |    |       |      |        |         |      |       |         |      |         |      |          |      |      |       |      |        |      |        |      |        |      |
| TRITON GJ1_67_2535 (bottle 1) 2010 180°C Abrasion              |    |       |      |        |         |      |       |         |      |         |      |          |      |      |       |      |        |      |        |      |        |      |
| GJ1_67_z1                                                      | 1  | 36.6  | 2.67 | 39.23  | 13.71   | 0.02 | 956   | 0.06009 | 0.58 | 0.80790 | 0.62 | 0.097560 | 0.13 | 0.41 | 606.0 | 12.0 | 601.30 | 2.80 | 600.12 | 0.76 | 600.22 | 0.76 |
| GJ1_67_z2                                                      | 2  | 573.7 | 1.81 | 575.53 | 316.39  | 0.02 | 21320 | 0.06008 | 0.06 | 0.80916 | 0.10 | 0.097725 | 0.06 | 0.80 | 605.5 | 1.4  | 601.98 | 0.45 | 601.06 | 0.32 | 601.16 | 0.32 |
| GJ1_67_z3                                                      | 3  | 292.7 | 1.76 | 294.46 | 165.90  | 0.02 | 11450 | 0.06007 | 0.07 | 0.80761 | 0.12 | 0.097561 | 0.08 | 0.80 | 604.9 | 1.5  | 601.11 | 0.53 | 600.10 | 0.46 | 600.20 | 0.46 |
| GJ1_67_z4                                                      | 4  | 121.2 | 1.68 | 122.90 | 72.20   | 0.02 | 4981  | 0.06005 | 0.13 | 0.80830 | 0.16 | 0.097661 | 0.05 | 0.59 | 604.5 | 2.9  | 601.49 | 0.72 | 600.69 | 0.30 | 600.78 | 0.30 |
| GJ1_67_z5                                                      | 5  | 141.8 | 1.62 | 143.37 | 87.68   | 0.02 | 6045  | 0.06011 | 0.11 | 0.80840 | 0.14 | 0.097585 | 0.05 | 0.59 | 606.4 | 2.5  | 601.54 | 0.62 | 600.24 | 0.31 | 600.34 | 0.31 |
| GJ1_67_z6                                                      | 6  | 66.1  | 1.86 | 67.99  | 35.55   | 0.02 | 2460  | 0.06006 | 0.24 | 0.80850 | 0.26 | 0.097684 | 0.05 | 0.49 | 604.6 | 5.1  | 601.60 | 1.20 | 600.82 | 0.29 | 600.92 | 0.29 |
| TRITON GJ1_67_535 2012 180°C Abrasion                          |    |       |      |        |         |      |       |         |      |         |      |          |      |      |       |      |        |      |        |      |        |      |
| GJ1_67_z7                                                      | 7  | 308.5 | 1.62 | 310.13 | 190.73  | 0.02 | 13130 | 0.06003 | 0.07 | 0.80730 | 0.14 | 0.097580 | 0.09 | 0.89 | 603.6 | 1.5  | 600.92 | 0.62 | 600.21 | 0.50 | 600.31 | 0.50 |
| GJ1_67_z8                                                      | 8  | 94.1  | 1.05 | 95.13  | 89.82   | 0.02 | 6191  | 0.06005 | 0.12 | 0.80860 | 0.15 | 0.097696 | 0.07 | 0.69 | 604.5 | 2.6  | 601.64 | 0.70 | 600.89 | 0.38 | 600.99 | 0.38 |
| GJ1_67_z9                                                      | 9  | 50.2  | 1.15 | 51.34  | 43.76   | 0.02 | 3026  | 0.05999 | 0.19 | 0.80710 | 0.22 | 0.097621 | 0.06 | 0.54 | 602.3 | 4.1  | 600.83 | 0.99 | 600.45 | 0.35 | 600.55 | 0.35 |
| GJ1_67_z10                                                     | 10 | 75.1  | 1.23 | 76.34  | 61.01   | 0.02 | 4223  | 0.06003 | 0.14 | 0.80710 | 0.17 | 0.097548 | 0.06 | 0.68 | 603.8 | 3.0  | 600.82 | 0.77 | 600.02 | 0.32 | 600.12 | 0.32 |
| GJ1_67_z12                                                     | 11 | 104.7 | 1.55 | 106.21 | 67.36   | 0.02 | 4648  | 0.06003 | 0.12 | 0.80770 | 0.17 | 0.097623 | 0.06 | 0.75 | 603.7 | 2.7  | 601.14 | 0.75 | 600.46 | 0.36 | 600.56 | 0.36 |
| TRITON GJ1_67_2535 (bottle 2) 10_13om 210 degree abrasion 2020 |    |       |      |        |         |      |       |         |      |         |      |          |      |      |       |      |        |      |        |      |        |      |
| GJ1_s17                                                        | 12 | 170.1 | 0.68 | 170.79 | 249.93  | 0.02 | 16575 | 0.06010 | 0.02 | 0.80869 | 0.07 | 0.097638 | 0.03 | 0.96 | 606.1 | 0.8  | 601.72 | 0.30 | 600.55 | 0.19 | 600.65 | 0.19 |
| GJ1_s18                                                        | 13 | 120.3 | 0.22 | 120.49 | 543.87  | 0.02 | 36054 | 0.06011 | 0.03 | 0.80857 | 0.06 | 0.097611 | 0.03 | 0.69 | 606.4 | 1.0  | 601.65 | 0.27 | 600.39 | 0.16 | 600.49 | 0.16 |
| GJ1_s19                                                        | 14 | 112.5 | 0.25 | 112.78 | 445.67  | 0.02 | 29547 | 0.06010 | 0.03 | 0.80863 | 0.06 | 0.097624 | 0.03 | 0.70 | 606.3 | 1.0  | 601.68 | 0.28 | 600.47 | 0.19 | 600.57 | 0.19 |
| GJ1_s20                                                        | 15 | 232.9 | 0.28 | 233.17 | 827.74  | 0.02 | 54853 | 0.06010 | 0.04 | 0.80835 | 0.07 | 0.097586 | 0.05 | 0.76 | 606.3 | 1.0  | 601.53 | 0.33 | 600.25 | 0.27 | 600.35 | 0.27 |
| GJ1_s21                                                        | 16 | 218.5 | 0.87 | 219.33 | 250.15  | 0.02 | 16590 | 0.06010 | 0.03 | 0.80845 | 0.06 | 0.097598 | 0.03 | 0.76 | 606.4 | 1.0  | 601.58 | 0.29 | 600.32 | 0.16 | 600.42 | 0.16 |
| PHOENIX GJ1_67_2535 (bottle 2) 2020 210°C Abrasion             |    |       |      |        |         |      |       |         |      |         |      |          |      |      |       |      |        |      |        |      |        |      |
| GJ-1_S8                                                        | 17 | 222.8 | 0.67 | 223.51 | 334.37  | 0.02 | 21889 | 0.06006 | 0.03 | 0.80847 | 0.05 | 0.097671 | 0.03 | 0.56 | 604.8 | 0.9  | 601.59 | 0.23 | 600.74 | 0.16 | 600.84 | 0.16 |
| GJ-1_S23                                                       | 18 | 199.5 | 0.96 | 200.44 | 208.81  | 0.02 | 13679 | 0.05999 | 0.05 | 0.80565 | 0.07 | 0.097437 | 0.04 | 0.54 | 604.4 | 1.4  | 600.01 | 0.34 | 599.37 | 0.21 | 599.47 | 0.21 |
| GJ-1_S25                                                       | 19 | 110.3 | 0.44 | 110.72 | 248.42  | 0.02 | 16250 | 0.06005 | 0.03 | 0.80466 | 0.05 | 0.097230 | 0.02 | 0.46 | 604.4 | 1.0  | 599.45 | 0.23 | 598.15 | 0.14 | 598.25 | 0.14 |
| GJ-1_S26                                                       | 20 | 93.1  | 0.50 | 93.64  | 187.12  | 0.02 | 12257 | 0.06008 | 0.05 | 0.80479 | 0.07 | 0.097199 | 0.03 | 0.53 | 605.4 | 1.2  | 599.53 | 0.31 | 597.98 | 0.17 | 598.07 | 0.17 |
| GJ-1_S27                                                       | 21 | 70.1  | 0.56 | 70.66  | 125.30  | 0.02 | 8211  | 0.06014 | 0.06 | 0.80833 | 0.07 | 0.097524 | 0.03 | 0.42 | 607.7 | 1.5  | 601.52 | 0.34 | 599.88 | 0.16 | 599.98 | 0.16 |
| GJ-1_S28                                                       | 22 | 38.0  | 0.32 | 38.35  | 120.09  | 0.02 | 7872  | 0.06002 | 0.08 | 0.80708 | 0.10 | 0.097570 | 0.04 | 0.58 | 603.3 | 1.9  | 600.81 | 0.46 | 600.15 | 0.22 | 600.25 | 0.22 |
| GJ-1_S29                                                       | 23 | 61.7  | 0.24 | 61.98  | 257.13  | 0.02 | 16840 | 0.05999 | 0.05 | 0.80604 | 0.07 | 0.097491 | 0.03 | 0.53 | 602.3 | 1.2  | 600.23 | 0.31 | 599.69 | 0.18 | 599.79 | 0.18 |
| GJ-1_S30                                                       | 24 | 247.2 | 0.23 | 247.45 | 1055.33 | 0.02 | 69037 | 0.06005 | 0.02 | 0.80791 | 0.04 | 0.097617 | 0.02 | 0.59 | 604.5 | 0.8  | 601.28 | 0.20 | 600.43 | 0.14 | 600.53 | 0.14 |
| PHOENIX GJ1_67_2535 (bottle 2) 2020 180°C Abrasion             |    |       |      |        |         |      |       |         |      |         |      |          |      |      |       |      |        |      |        |      |        |      |
| GJ-1_S1                                                        | 25 | 383.4 | 1.30 | 384.70 | 294.61  | 0.02 | 19310 | 0.06000 | 0.05 | 0.80825 | 0.09 | 0.097751 | 0.06 | 0.73 | 602.4 | 1.3  | 601.47 | 0.40 | 601.22 | 0.36 | 601.31 | 0.36 |
| GJ-1_S3                                                        | 26 | 181.7 | 1.00 | 182.73 | 182.16  | 0.02 | 11946 | 0.06004 | 0.04 | 0.80655 | 0.07 | 0.097468 | 0.03 | 0.65 | 604.2 | 1.1  | 600.52 | 0.30 | 599.56 | 0.20 | 599.65 | 0.20 |
| GJ-1_S4                                                        | 27 | 95.8  | 0.49 | 96.33  | 196.51  | 0.02 | 12882 | 0.06008 | 0.04 | 0.80538 | 0.08 | 0.097271 | 0.05 | 0.72 | 605.4 | 1.2  | 599.86 | 0.36 | 598.40 | 0.31 | 598.50 | 0.31 |
| GJ-1_S5                                                        | 28 | 301.8 | 0.89 | 302.65 | 339.88  | 0.02 | 22272 | 0.06008 | 0.03 | 0.80751 | 0.06 | 0.097521 | 0.04 | 0.68 | 605.5 | 0.9  | 601.06 | 0.26 | 599.87 | 0.21 | 599.97 | 0.21 |
| GJ-1_S6                                                        | 29 | 294.6 | 0.49 | 295.09 | 599.08  | 0.02 | 39250 | 0.06008 | 0.02 | 0.80837 | 0.05 | 0.097632 | 0.03 | 0.65 | 605.4 | 0.8  | 601.54 | 0.22 | 600.52 | 0.17 | 600.61 | 0.17 |
| GJ-1_S7                                                        | 30 | 736.8 | 0.55 | 737.34 | 1338.08 | 0.02 | 87645 | 0.06007 | 0.01 | 0.80814 | 0.05 | 0.097620 | 0.04 | 0.75 | 605.0 | 0.8  | 601.41 | 0.24 | 600.45 | 0.22 | 600.55 | 0.22 |
| <b>Grand mean JG-1:</b>                                        |    |       |      |        |         |      |       |         |      |         |      |          |      |      |       |      |        |      |        |      |        |      |
| Th-uncorrected:                                                |    |       |      |        |         |      |       |         |      |         |      |          |      |      |       |      |        |      |        |      |        |      |
